# Supplementary material for: Differential genome-wide profiling of alternative polyadenylation sites in nasopharyngeal carcinoma by high-throughput sequencing
Source: J Biomed Sci. 2018 Oct 23;25:74. doi: 10.1186/s12929-018-0477-6 (PMC6198351; doi:10.1186/s12929-018-0477-6)
Supplement: Supplementary file 3 — Details of the 195 genes with significant differences in 3’UTR lengths between NPC and NNET. (XLSX 96 kb) [file 12929_2018_477_MOESM3_ESM.xlsx]

## Sheet: tandem_gene.annot
Additional file 3: Details of the 195 genes with significant differences in 3'UTR lengths between NPC and NNET
Gene_ID	GeneSymbol	chr	strand	stopCoden.lastExon5End	tandemPolyA_NO	plaID	polyA_pos	polyA_supportReads	PAS	sampleNO	supportReads_sample
uc001adk.2	B3GALT6	chr1	+	1168648	4	pla_solexa_sample_N0000500,pla_solexa_sample_N0000503,pla_solexa_sample_N0000507,pla_solexa_sample_N0000516,	1169106,1169253,1169558,1170415,	9890.053,99.667,459.850,1030.433,	TATAAA,none,AGTAAA,ATTAAA,	12	486.334,2.420,22.988,76.219, 985.055,8.200,34.055,97.121, 630.310,6.963,29.112,92.397, 300.526,5.168,30.274,105.591, 657.697,10.875,22.479,42.783, 860.621,9.269,31.372,51.337, 1281.005,8.711,58.650,94.074, 544.045,7.754,21.142,98.662, 1676.832,13.845,86.069,92.091, 660.025,5.721,52.089,100.748, 1139.886,11.157,21.141,52.263, 667.720,9.585,50.478,127.154,
uc001aqk.1	CNBP1_HUMAN	chr1	-	9910776	3	pla_solexa_sample_N0006743,pla_solexa_sample_N0006744,pla_solexa_sample_N0006750,	9908337,9910169,9910497,	2027.477,5588.203,88.764,	multi,AAGAAA,AAGAAA,	12	205.663,195.985,4.840, 353.159,1516.053,22.703, 151.883,239.848,5.064, 93.777,272.474,9.597, 136.323,229.867,5.075, 197.509,571.846,12.121, 113.236,303.703,3.484, 119.098,558.843,3.523, 108.942,266.033,4.816, 291.373,537.525,6.294, 91.027,440.452,2.935, 165.492,455.583,8.307,
uc001bal.2	KIAA1470	chr1	-	17735586	7	pla_solexa_sample_N0014015,pla_solexa_sample_N0014016,pla_solexa_sample_N0014019,pla_solexa_sample_N0014023,pla_solexa_sample_N0014025,pla_solexa_sample_N0014026,pla_solexa_sample_N0014030,	17733257,17733418,17734164,17735174,17735249,17735352,17735508,	9768.353,249.717,213.225,10.892,17.900,125.712,60.291,	multi,none,none,none,AATACA,ATTAAA,none,	12	1014.391,47.182,22.986,0.000,0.605,4.840,1.815, 2717.412,47.301,34.685,3.154,2.523,5.676,9.461, 148.719,7.594,6.963,0.633,0.000,2.532,5.697, 880.192,22.888,12.552,0.000,0.738,19.936,3.691, 131.975,14.502,9.426,0.725,0.725,6.525,1.450, 638.871,18.538,20.677,0.000,2.852,14.973,6.417, 340.865,13.937,20.908,1.743,1.742,9.291,4.065, 642.705,21.142,23.255,0.000,1.409,11.275,4.933, 337.655,19.261,21.668…
uc001bbo.2	A8K6F3	chr1	-	19545797	5	pla_solexa_sample_N0014600,pla_solexa_sample_N0014603,pla_solexa_sample_N0014604,pla_solexa_sample_N0014607,pla_solexa_sample_N0014609,	19544586,19544716,19544825,19545184,19545440,	649.304,103.487,11.103,49.007,354.514,	CATAAA,ATTAAA,none,none,none,	12	29.035,3.630,0.000,1.210,6.050, 58.651,8.831,1.261,7.568,4.416, 55.691,6.963,0.000,1.899,2.532, 42.827,5.168,0.738,1.476,2.214, 45.682,7.250,1.450,0.000,36.982, 81.997,14.973,1.426,7.130,62.031, 56.327,12.196,0.581,7.549,12.194, 42.284,4.935,0.705,1.410,18.325, 60.190,10.835,0.000,6.621,12.642, 77.852,9.728,0.572,8.013,91.015, 39.345,9.397,1.174,2.936,57.550, 59.425,9.585,3.195,3.195,48.564,
uc001bdo.1	B2RDQ4	chr1	-	20978872	3	pla_solexa_sample_N0015744,pla_solexa_sample_N0015746,pla_solexa_sample_N0015748,	20978274,20978500,20978682,	482.293,45.957,5587.628,	AATAAA,ACTAAA,TATAAA,	12	6.655,2.420,358.700, 8.830,4.414,732.172, 88.600,8.860,402.488, 61.286,6.645,272.475, 5.800,1.450,353.141, 82.711,7.130,658.835, 77.235,1.162,325.769, 21.846,3.523,615.223, 111.350,1.204,294.322, 1.717,2.861,557.561, 11.158,1.174,460.419, 5.112,5.112,556.538,
uc001bsc.2	KIAA0085	chr1	-	31206675	5	pla_solexa_sample_N0026678,pla_solexa_sample_N0026681,pla_solexa_sample_N0026685,pla_solexa_sample_N0026690,pla_solexa_sample_N0026694,	31205317,31205665,31205950,31206173,31206287,	14415.864,135.170,29.238,52.190,17059.186,	AATAAA,none,multi,multi,AGTAAA,	12	1754.167,19.356,3.025,2.420,1747.517, 826.135,3.153,1.262,2.523,1088.480, 1327.057,18.986,2.532,9.493,1645.374, 1401.511,25.845,3.691,5.906,1863.760, 1517.712,15.952,1.450,3.625,1058.700, 1060.271,6.417,2.852,3.565,1260.632, 861.745,9.291,0.581,4.646,1218.868, 1482.732,10.571,4.228,2.115,1116.982, 143.247,0.602,0.000,0.602,216.073, 818.025,9.158,3.432,5.724,1469.469, 1898.045,8.809,2.348,6.459,21…
uc001cri.2	ADK	chr1	+	47842417	6	pla_solexa_sample_N0046692,pla_solexa_sample_N0046700,pla_solexa_sample_N0046703,pla_solexa_sample_N0046705,pla_solexa_sample_N0046713,pla_solexa_sample_N0046724,	47842671,47843319,47843445,47843538,47843842,47844509,	15.144,26.557,927.239,68.609,19.046,5661.903,	none,AATAAA,AATAAA,GATAAA,AATAGA,multi,	12	3.025,1.815,78.032,5.445,2.420,402.249, 0.000,1.893,80.092,4.416,1.262,313.429, 0.000,0.000,96.192,2.532,1.899,539.809, 0.000,0.738,82.703,5.906,1.476,16.982, 2.900,3.625,46.409,6.526,0.725,299.483, 2.852,4.278,48.484,6.417,2.139,402.858, 1.162,2.323,67.939,7.548,1.162,671.859, 2.114,3.524,125.440,10.571,1.410,434.813, 0.602,1.204,63.198,5.418,3.612,583.823, 0.572,1.717,66.974,3.434,1.716,660.028…
uc001cwn.2	AK124967	chr1	-	54497823	5	pla_solexa_sample_N0054637,pla_solexa_sample_N0054638,pla_solexa_sample_N0054639,pla_solexa_sample_N0054644,pla_solexa_sample_N0054646,	54497354,54497488,54497529,54497691,54497787,	19669.006,10.021,23.382,23122.476,43.372,	ATTAAA,none,none,multi,AATAGA,	12	1255.139,1.210,1.815,1190.418,0.605, 2011.102,1.262,0.631,1619.477,2.524, 2072.539,1.266,5.696,2671.836,3.797, 1288.533,0.000,2.954,2221.151,4.430, 1714.226,0.725,0.725,1856.350,2.900, 1804.673,0.713,0.000,1880.963,5.704, 1456.954,1.162,0.581,1668.907,1.742, 1339.674,0.705,2.114,1645.523,6.342, 1385.522,2.408,1.806,851.657,0.602, 2480.414,0.572,3.434,3069.454,6.297, 1361.874,0.000,2.350,2110.055,…
uc001ddz.1	DDIT1	chr1	+	68153457	4	pla_solexa_sample_N0067401,pla_solexa_sample_N0067403,pla_solexa_sample_N0067405,pla_solexa_sample_N0067406,	68153682,68153831,68153917,68154012,	1363.949,184.400,105.151,5267.881,	multi,AGTAAA,multi,multi,	12	59.889,9.073,3.025,113.115, 77.574,11.352,6.938,470.455, 90.499,10.126,3.798,265.792, 103.373,20.673,10.336,290.935, 83.386,7.976,2.900,155.902, 185.384,29.234,9.269,423.539, 99.300,9.873,13.357,448.292, 95.140,16.914,7.753,473.575, 219.090,22.270,16.854,622.343, 113.910,16.600,10.300,788.257, 58.139,4.111,5.285,402.278, 178.275,26.198,15.336,813.402,
uc001dgn.2	B4DSP9	chr1	+	75229797	6	pla_solexa_sample_N0071019,pla_solexa_sample_N0071023,pla_solexa_sample_N0071024,pla_solexa_sample_N0071041,pla_solexa_sample_N0071042,pla_solexa_sample_N0071043,	75229863,75230081,75230147,75232262,75232302,75232357,	62.820,3960.969,16.777,19.725,31.152,521.477,	TATAAA,AATAAA,multi,AAGAAA,ATTAAA,multi,	12	1.210,195.379,0.000,1.815,1.210,28.430, 3.785,173.426,3.155,5.045,3.154,47.930, 3.165,254.401,0.633,1.266,1.266,37.972, 6.645,270.995,2.215,0.738,2.953,53.166, 6.525,182.010,1.450,0.725,1.450,34.806, 3.565,229.593,1.426,2.852,4.991,29.234, 7.550,544.107,0.581,1.742,0.581,42.392, 2.115,159.266,0.705,1.410,4.228,35.942, 15.047,793.877,1.806,0.602,2.408,43.936, 4.578,589.617,1.716,1.717,4.006,84.721…
uc001dkv.2	B3KX89	chr1	-	85718312	6	pla_solexa_sample_N0078159,pla_solexa_sample_N0078163,pla_solexa_sample_N0078164,pla_solexa_sample_N0078167,pla_solexa_sample_N0078168,pla_solexa_sample_N0078169,	85715640,85717115,85717192,85717653,85717781,85717879,	1103.402,72.458,14.137,305.294,49.556,348.964,	ATTAAA,AATAAA,AATAAA,AATAAA,none,multi,	12	78.635,9.073,1.815,22.987,5.445,28.432, 137.481,6.938,1.261,21.444,4.416,15.137, 74.675,8.860,0.633,20.252,6.962,44.934, 70.149,5.169,2.214,36.918,3.691,39.872, 93.542,7.251,1.450,15.227,3.625,23.204, 88.415,5.704,0.000,30.659,3.565,20.677, 62.715,8.710,1.162,29.033,5.808,33.680, 87.385,2.115,1.410,20.438,2.820,24.666, 73.430,7.223,1.806,39.123,7.224,45.745, 154.561,4.007,0.572,25.759,2.860,23.46…
uc001dlw.2	CGI-61	chr1	+	87208918	16	pla_solexa_sample_N0079950,pla_solexa_sample_N0079951,pla_solexa_sample_N0079952,pla_solexa_sample_N0079953,pla_solexa_sample_N0079955,pla_solexa_sample_N0079956,pla_solexa_sample_N0079957,pla_solexa_sample_N0079959,pla_solexa_sample_N0079960,pla_solexa_sample_N0079970,pla_solexa_sample_N0079971,pla_solexa_sample_N0079972,pla_solexa_sample_N0079978,pla_solexa_sample_N0079980,pla_solexa_sample_N00…	87209001,87209082,87209268,87209330,87209652,87209816,87209973,87210119,87210158,87211477,87211602,87211753,87212554,87212967,87213552,87213863,	948.246,80.553,1118.265,19.951,14.876,51.503,36.898,97.507,19.580,16.000,143.690,49.795,26.831,27.048,22.604,6194.456,	AATAAA,AATAAA,AATAAA,multi,ATTAAA,multi,TATAAA,ATTAAA,none,none,multi,AAGAAA,none,AATAAA,multi,multi,	12	119.769,7.865,70.168,2.420,1.210,1.815,0.605,8.469,1.210,1.815,27.220,6.050,3.630,4.235,3.025,248.612, 79.460,6.938,73.153,1.893,2.523,4.416,3.784,6.308,1.892,1.261,19.550,6.308,6.308,0.631,1.893,841.900, 49.996,4.431,101.887,1.899,1.266,2.532,2.532,5.064,0.000,2.532,8.861,4.431,1.266,1.266,2.532,633.470, 75.318,8.119,104.853,3.692,0.000,4.428,2.953,9.596,1.477,2.215,16.243,5.167,2.215,1.477,2.21…
uc001dnl.3	AD158	chr1	+	90180541	9	pla_solexa_sample_N0084082,pla_solexa_sample_N0084083,pla_solexa_sample_N0084089,pla_solexa_sample_N0084090,pla_solexa_sample_N0084102,pla_solexa_sample_N0084103,pla_solexa_sample_N0084105,pla_solexa_sample_N0084117,pla_solexa_sample_N0084119,	90180641,90180712,90181418,90181618,90182994,90183375,90183712,90185008,90185087,	46.525,1557.344,12.866,40.735,105.605,25.090,44.614,14.086,3024.816,	TATAAA,AATAAA,none,none,none,none,TATAAA,AAGAAA,multi,	12	3.630,76.217,1.210,4.839,7.258,3.629,3.025,0.000,200.824, 1.262,78.199,1.262,0.631,8.198,2.523,1.892,0.631,213.786, 6.962,150.615,0.633,3.798,15.821,1.266,6.962,0.633,372.110, 7.384,112.237,3.692,7.384,12.553,0.738,5.907,0.738,350.008, 9.426,163.155,1.450,9.427,21.028,6.526,3.625,2.175,188.533, 2.139,113.370,0.713,2.139,12.121,1.426,1.426,3.565,293.767, 4.645,170.141,0.581,1.742,7.549,3.484,2.323…
uc001egv.1	CD9P1	chr1	+	117529589	7	pla_solexa_sample_N0110247,pla_solexa_sample_N0110251,pla_solexa_sample_N0110253,pla_solexa_sample_N0110254,pla_solexa_sample_N0110255,pla_solexa_sample_N0110257,pla_solexa_sample_N0110268,	117529891,117530186,117530337,117531228,117531600,117532188,117532971,	51.978,12.819,152.741,572.351,12.673,10.052,2471.564,	none,none,AATGAA,AATAAA,none,none,ATTAAA,	12	0.605,0.605,7.865,43.554,0.000,0.000,87.709, 6.307,0.000,37.208,54.239,1.892,2.522,440.186, 1.899,0.633,7.595,20.252,0.000,0.000,156.944, 0.738,0.738,3.691,15.503,0.000,0.738,98.944, 1.450,1.450,5.075,28.279,1.450,1.450,106.594, 8.556,2.139,11.408,54.901,2.139,0.713,327.990, 4.647,0.581,16.842,79.554,3.484,2.323,200.338, 2.115,0.705,8.456,18.323,0.705,0.000,159.267, 7.224,3.010,13.241,128.803,1.2…
uc001evn.2	B4DWC9	chr1	-	150705522	9	pla_solexa_sample_N0119635,pla_solexa_sample_N0119636,pla_solexa_sample_N0119638,pla_solexa_sample_N0119644,pla_solexa_sample_N0119650,pla_solexa_sample_N0119652,pla_solexa_sample_N0119655,pla_solexa_sample_N0119661,pla_solexa_sample_N0119662,	150702558,150702667,150702753,150703496,150704359,150704543,150704859,150705094,150705259,	1024.746,10924.994,379.152,55.360,76.350,10.195,4644.746,123.564,127.162,	multi,multi,TATAAA,multi,AGTAAA,AATAAA,AATAAA,none,multi,	12	49.600,1145.047,8.469,3.630,14.518,1.210,332.084,14.518,7.863, 70.003,1012.170,34.056,8.203,4.416,0.000,439.553,6.937,8.830, 75.309,1471.976,10.759,1.899,9.494,1.266,508.167,22.783,29.111, 103.376,671.218,42.088,4.428,11.814,1.477,409.081,14.768,16.245, 110.219,806.353,45.683,2.900,12.326,0.000,262.498,7.976,4.350, 92.693,1158.670,34.225,3.565,7.130,1.426,437.799,17.112,10.695, 66.779,739.801,21.…
uc001fvs.2	D3DVE7	chr1	-	160249341	6	pla_solexa_sample_N0130682,pla_solexa_sample_N0130693,pla_solexa_sample_N0130696,pla_solexa_sample_N0130697,pla_solexa_sample_N0130699,pla_solexa_sample_N0130702,	160246669,160247605,160248001,160248272,160248447,160249016,	11385.737,45.430,189.245,4285.398,13.355,10.011,	multi,AATACA,AATATA,AATAAA,AATAAA,none,	12	635.741,2.420,4.235,255.263,1.815,1.210, 1368.485,2.523,15.137,544.241,1.261,0.000, 860.661,1.899,11.392,277.183,1.266,0.633, 496.949,2.954,14.028,250.321,1.477,0.738, 996.336,3.625,8.701,255.246,1.450,0.725, 1220.700,3.565,12.121,226.743,0.000,0.713, 1043.497,5.807,23.225,422.162,0.581,1.162, 792.812,4.229,19.734,216.350,1.409,0.705, 1360.248,6.622,28.290,381.592,0.602,1.204, 867.249,6.296,16.02…
uc001gcn.2	NM_003617	chr1	-	163117132	26	pla_solexa_sample_N0135099,pla_solexa_sample_N0135104,pla_solexa_sample_N0135111,pla_solexa_sample_N0135116,pla_solexa_sample_N0135117,pla_solexa_sample_N0135119,pla_solexa_sample_N0135120,pla_solexa_sample_N0135121,pla_solexa_sample_N0135123,pla_solexa_sample_N0135124,pla_solexa_sample_N0135128,pla_solexa_sample_N0135129,pla_solexa_sample_N0135132,pla_solexa_sample_N0135133,pla_solexa_sample_N01…	163112093,163112462,163112869,163113244,163113454,163113697,163113778,163113909,163114246,163114274,163114593,163114660,163114848,163114913,163115029,163115166,163115449,163115686,163115739,163115971,163116117,163116217,163116293,163116641,163116774,163116865,	932.029,16.102,577.573,22.055,45.227,52.490,668.326,169.948,15.126,10.538,14.276,23.027,17.366,52.327,12.131,23.413,52.974,1268.230,20.719,41.458,30.740,295.095,10.718,954.280,273.011,100.317,	multi,ATTAAA,multi,none,none,multi,AATAAA,AATAAA,none,none,AAGAAA,multi,none,none,none,AATAAA,AATACA,multi,none,none,none,AATGAA,none,AATAAA,multi,AATATA,	12	45.368,0.605,29.036,2.420,3.024,1.815,21.777,10.284,0.605,0.000,1.210,0.000,0.605,1.815,0.000,1.210,2.420,61.700,1.815,4.235,1.815,21.173,0.000,30.246,24.195,12.099, 75.676,1.261,44.146,2.522,2.523,5.046,85.138,13.245,0.631,0.631,0.000,0.631,0.000,0.631,0.000,1.893,8.199,157.028,1.262,4.414,2.523,43.515,0.631,150.095,20.181,8.830, 220.860,0.000,154.413,4.430,11.391,3.165,69.613,15.822,3.165,0.633…
uc001giy.1	A8JZY7	chr1	+	173457002	7	pla_solexa_sample_N0145910,pla_solexa_sample_N0145913,pla_solexa_sample_N0145915,pla_solexa_sample_N0145916,pla_solexa_sample_N0145917,pla_solexa_sample_N0145918,pla_solexa_sample_N0145921,	173457149,173457314,173457470,173457545,173457577,173457653,173457944,	4949.454,22.949,131.371,13.143,20.407,79.431,3323.082,	ATTAAA,AATGAA,TATAAA,none,AATACA,none,AATAAA,	12	258.286,0.605,7.864,0.000,1.815,3.630,194.171, 478.655,1.261,3.786,1.892,1.892,10.090,196.129, 456.278,2.532,7.596,0.633,0.000,12.024,280.349, 502.122,2.953,10.336,0.000,0.000,8.122,259.181, 258.147,2.900,7.975,0.000,0.725,6.526,208.114, 264.533,2.139,7.843,2.139,3.565,7.130,265.960, 703.215,1.743,20.907,0.581,3.484,9.292,343.189, 277.660,2.820,6.343,0.705,0.000,6.342,225.511, 821.562,3.612,30.69…
uc001gxc.2	B2RDM5	chr1	+	201938682	5	pla_solexa_sample_N0171211,pla_solexa_sample_N0171212,pla_solexa_sample_N0171213,pla_solexa_sample_N0171216,pla_solexa_sample_N0171217,	201938921,201939062,201939285,201939477,201939786,	155.531,1333.389,118.563,10672.902,72.932,	multi,AATAAA,AGTAAA,AATAAA,multi,	12	14.518,68.960,3.025,709.533,3.630, 10.091,37.208,9.461,1126.320,4.416, 5.064,87.335,10.127,529.684,5.696, 16.983,87.130,8.122,619.529,8.121, 16.677,156.630,5.800,655.526,5.075, 6.417,158.291,7.130,822.835,6.417, 19.745,101.041,15.680,1067.309,8.129, 19.734,80.339,4.933,1259.336,6.343, 21.067,347.887,21.068,1669.005,11.436, 9.731,66.974,10.302,634.843,5.723, 5.285,46.393,8.222,869.743,4.110, 10.22…
uc001huu.3	DQ975380	chr1	-	231502157	7	pla_solexa_sample_N0197591,pla_solexa_sample_N0197596,pla_solexa_sample_N0197599,pla_solexa_sample_N0197608,pla_solexa_sample_N0197623,pla_solexa_sample_N0197624,pla_solexa_sample_N0197630,	231499506,231499761,231499855,231500371,231501657,231501753,231502090,	1261.422,27.418,36.603,152.191,1669.720,48.262,61.986,	multi,GATAAA,none,ATTAAA,multi,none,AATAAA,	12	35.690,0.605,1.210,22.986,80.450,2.420,4.234, 99.012,2.524,3.785,17.660,86.401,3.785,5.046, 120.241,1.266,1.266,7.595,93.663,3.798,8.861, 104.114,2.214,4.428,19.198,113.713,3.691,7.382, 67.435,2.175,5.075,16.677,71.786,6.525,3.625, 82.710,0.713,2.852,10.695,90.554,2.852,4.991, 117.881,6.968,1.162,19.744,246.217,9.291,6.969, 81.043,0.705,4.934,10.572,53.561,2.820,2.819, 179.362,4.816,6.020,7.826,3…
uc001hwq.2	A1L465	chr1	-	235331840	4	pla_solexa_sample_N0201085,pla_solexa_sample_N0201086,pla_solexa_sample_N0201088,pla_solexa_sample_N0201091,	235330220,235330352,235330438,235330613,	3618.230,237.554,15.798,1517.626,	multi,multi,AAGAAA,AATACA,	12	192.960,24.802,3.025,151.224, 298.924,27.751,1.262,140.005, 335.406,11.393,0.633,132.898, 420.896,24.366,2.214,132.174, 287.876,43.508,0.725,187.084, 268.810,13.547,1.426,166.847, 220.082,13.936,1.743,91.749, 282.593,40.172,0.705,126.145, 124.590,3.612,0.000,55.375, 389.836,12.019,1.717,84.719, 405.214,13.507,2.348,120.975, 391.047,8.946,0.000,128.434,
uc001imx.1	A8K1P4	chr10	-	14563189	8	pla_solexa_sample_N1346955,pla_solexa_sample_N1346963,pla_solexa_sample_N1346964,pla_solexa_sample_N1346970,pla_solexa_sample_N1346981,pla_solexa_sample_N1346982,pla_solexa_sample_N1346983,pla_solexa_sample_N1346985,	14560559,14561123,14561151,14561520,14562654,14562702,14562804,14562926,	8817.956,73.542,10.326,767.735,11.078,93.316,268.587,1200.322,	multi,multi,none,AATAAA,none,none,none,none,	12	814.784,9.679,1.815,92.549,3.630,6.050,28.430,184.490, 489.376,3.155,0.631,23.336,0.000,6.939,27.118,56.760, 850.535,7.596,1.899,88.600,0.000,4.430,10.126,162.009, 973.232,14.027,1.476,91.561,0.738,10.335,23.630,113.714, 530.799,12.327,1.450,54.384,3.625,7.976,53.659,142.127, 395.729,2.852,0.000,52.050,0.713,6.417,8.556,114.796, 642.824,4.065,1.161,46.457,0.000,7.549,32.519,90.007, 1040.872,9.161…
uc001kaf.2	KIAA1224	chr10	+	81072506	8	pla_solexa_sample_N1396770,pla_solexa_sample_N1396774,pla_solexa_sample_N1396775,pla_solexa_sample_N1396776,pla_solexa_sample_N1396780,pla_solexa_sample_N1396788,pla_solexa_sample_N1396792,pla_solexa_sample_N1396793,	81073155,81074317,81074377,81074420,81075537,81075826,81076134,81076273,	18.438,15.557,17.580,204.531,18.315,240.581,1177.296,819.853,	CATAAA,none,none,none,AATAGA,AAGAAA,AATAAA,AATAAA,	12	0.605,1.210,1.210,7.865,4.235,30.850,90.735,53.835, 1.893,1.262,0.631,12.614,0.000,17.658,95.856,74.417, 0.000,0.000,1.899,2.532,0.633,23.417,109.483,74.043, 0.738,0.738,0.738,5.167,1.476,29.536,98.209,80.485, 0.000,2.175,0.000,9.426,0.000,18.852,75.413,42.782, 2.139,0.713,0.713,10.695,2.139,31.373,107.666,62.746, 4.066,3.485,5.226,51.101,2.324,15.679,115.558,72.588, 0.705,0.000,0.000,3.524,2.115…
uc001khh.2	B7Z892	chr10	+	93038073	11	pla_solexa_sample_N1405309,pla_solexa_sample_N1405312,pla_solexa_sample_N1405315,pla_solexa_sample_N1405319,pla_solexa_sample_N1405324,pla_solexa_sample_N1405333,pla_solexa_sample_N1405334,pla_solexa_sample_N1405338,pla_solexa_sample_N1405352,pla_solexa_sample_N1405365,pla_solexa_sample_N1405366,	93038438,93038587,93038935,93039455,93039769,93040735,93040904,93041264,93042985,93044012,93044085,	15.884,10.197,11.405,31.908,18.914,816.357,20.089,35.829,12.801,3029.942,397.786,	AGTAAA,none,none,none,ATTAAA,multi,multi,multi,multi,multi,ATTAAA,	12	2.420,1.210,1.815,3.025,2.420,86.498,0.000,1.815,0.605,287.321,24.196, 0.000,0.631,1.262,3.155,0.000,52.972,1.262,3.154,3.154,541.085,52.345, 1.266,0.633,1.266,1.266,2.532,110.747,3.165,6.328,1.899,233.516,33.541, 2.214,2.954,1.476,5.168,2.954,73.101,0.738,2.952,1.476,140.298,21.415, 0.725,1.450,0.725,3.625,2.900,44.958,2.175,4.351,0.725,204.488,31.180, 0.713,1.426,0.713,1.426,1.426,39.216,0.713,…
uc001kwa.2	ARFL3	chr10	-	104436651	2	pla_solexa_sample_N1418524,pla_solexa_sample_N1418537,	104433491,104436425,	728.349,2221.645,	AATAAA,multi,	12	29.640,121.584, 134.328,227.031, 75.941,301.866, 59.070,215.615, 58.735,316.158, 55.616,227.455, 35.423,116.720, 67.654,231.854, 15.048,70.422, 88.155,121.355, 64.012,152.102, 44.728,119.486,
uc001mek.1	AY268890	chr11	-	6635777	8	pla_solexa_sample_N1445433,pla_solexa_sample_N1445436,pla_solexa_sample_N1445438,pla_solexa_sample_N1445441,pla_solexa_sample_N1445443,pla_solexa_sample_N1445446,pla_solexa_sample_N1445447,pla_solexa_sample_N1445459,	6634004,6634249,6634403,6634476,6634614,6634787,6634983,6635543,	38622.382,128.095,34.052,13.917,43.696,49.121,18642.328,199.378,	ATTAAA,AATAAA,none,none,AGTAAA,none,multi,none,	12	3139.356,6.654,3.025,0.000,7.259,5.444,933.342,16.332, 3525.890,10.721,4.415,1.893,4.415,5.046,2464.534,18.289, 3269.232,16.456,0.633,1.266,2.532,5.697,1122.023,12.658, 3245.337,10.336,2.215,0.000,1.476,2.953,961.412,18.459, 2619.920,8.700,2.175,0.000,3.625,4.351,934.699,18.127, 3551.590,10.695,4.278,2.852,4.278,7.843,1359.030,15.686, 2940.615,5.227,0.581,0.581,3.484,0.581,1091.118,7.551, 2246.64…
uc001mhe.1	C11orf15	chr11	-	8969867	4	pla_solexa_sample_N1448338,pla_solexa_sample_N1448339,pla_solexa_sample_N1448340,pla_solexa_sample_N1448348,	8968750,8968842,8969058,8969606,	642.133,2288.572,2497.172,323.526,	TATAAA,AATAAA,AATAAA,AATAAA,	12	34.479,305.467,140.938,12.703, 72.524,10.090,215.047,16.398, 62.651,11.392,253.767,37.972, 39.874,13.291,209.709,31.750, 48.584,727.311,189.260,2.175, 40.642,17.112,204.638,32.798, 45.875,178.271,210.792,29.035, 45.806,116.984,162.790,16.913, 43.937,266.031,170.333,36.716, 100.750,628.545,255.310,25.758, 54.615,7.047,236.669,19.967, 52.395,7.029,247.919,61.341,
uc001mis.1	A8K149	chr11	-	10536463	12	pla_solexa_sample_N1450837,pla_solexa_sample_N1450840,pla_solexa_sample_N1450843,pla_solexa_sample_N1450847,pla_solexa_sample_N1450853,pla_solexa_sample_N1450859,pla_solexa_sample_N1450867,pla_solexa_sample_N1450868,pla_solexa_sample_N1450871,pla_solexa_sample_N1450873,pla_solexa_sample_N1450878,pla_solexa_sample_N1450883,	10533226,10533482,10533688,10533880,10534380,10534842,10535106,10535197,10535404,10535633,10536084,10536291,	1542.869,4532.974,116.409,25.653,16.157,18.469,59.127,17.131,15.990,31.085,37.372,1442.087,	multi,multi,AATATA,multi,AATAAA,AATAAA,ATTAAA,multi,ACTAAA,ACTAAA,multi,multi,	12	122.796,245.587,9.075,1.210,1.210,1.210,0.605,3.630,0.000,1.210,4.235,115.536, 340.550,572.623,14.506,0.631,2.524,2.524,6.307,1.892,1.893,2.523,4.415,155.138, 86.703,516.395,9.493,2.532,0.633,1.266,6.330,1.899,1.899,3.798,0.633,87.332, 93.036,324.161,10.338,0.738,0.000,0.000,4.430,2.214,3.692,2.953,1.476,115.192, 87.740,401.000,6.526,1.450,1.450,2.175,2.175,0.725,1.450,2.900,5.075,60.184, 119.074…
uc001pac.2	A8K8I4	chr11	-	82972953	4	pla_solexa_sample_N1506126,pla_solexa_sample_N1506128,pla_solexa_sample_N1506131,pla_solexa_sample_N1506134,	82972407,82972504,82972670,82972806,	16.810,1552.864,40.432,4708.257,	AATAAA,multi,AATAGA,ACTAAA,	12	0.605,74.401,1.815,418.582, 2.524,152.616,3.154,363.247, 1.266,144.922,5.063,468.933, 1.476,126.268,2.953,366.255, 0.725,74.690,2.900,374.897, 1.426,114.084,1.426,496.265, 0.581,109.753,1.742,323.445, 2.115,150.812,2.114,271.320, 1.806,110.145,0.602,277.466, 1.144,148.833,2.289,437.347, 0.587,152.103,9.983,355.884, 2.556,194.245,6.390,554.621,
uc001pff.2	B2R6B8	chr11	+	94801238	9	pla_solexa_sample_N1515572,pla_solexa_sample_N1515575,pla_solexa_sample_N1515577,pla_solexa_sample_N1515582,pla_solexa_sample_N1515583,pla_solexa_sample_N1515592,pla_solexa_sample_N1515594,pla_solexa_sample_N1515596,pla_solexa_sample_N1515598,	94802076,94802281,94802385,94802666,94802729,94803990,94804107,94804386,94804448,	49.410,1006.876,128.908,762.196,25.819,152.079,68.351,5783.158,10.339,	none,AATAAA,AATATA,AATAAA,ATTAAA,multi,none,AATAAA,AATGAA,	12	5.445,95.575,9.075,48.392,2.420,12.099,11.494,313.333,0.605, 3.784,52.346,6.307,37.839,0.000,10.721,3.784,447.753,1.261, 2.532,97.458,14.556,87.332,1.899,20.885,3.798,566.391,0.633, 7.382,104.853,17.720,59.810,0.000,25.103,12.553,513.195,0.000, 5.075,55.835,8.700,96.442,2.900,15.952,10.152,469.889,0.725, 3.565,69.876,8.556,59.894,1.426,8.556,1.426,308.026,0.000, 5.226,101.041,12.194,53.423,3.486,…
uc001qtr.2	B2R606	chr12	-	8074009	5	pla_solexa_sample_N1554089,pla_solexa_sample_N1554090,pla_solexa_sample_N1554092,pla_solexa_sample_N1554099,pla_solexa_sample_N1554101,	8071828,8072191,8072303,8073146,8073389,	3036.860,671.336,32.771,2506.931,54.510,	AATAAA,ACTAAA,AATAAA,AATAAA,AATAAA,	12	235.302,36.293,1.815,169.369,6.655, 160.814,35.316,3.785,290.725,1.892, 207.571,39.237,0.633,110.749,1.899, 234.076,32.491,2.214,93.041,8.122, 99.343,19.579,0.725,85.566,7.251, 136.899,34.938,0.713,64.173,2.139, 529.589,167.819,4.646,461.651,6.969, 136.716,33.827,2.115,209.302,2.115, 748.133,181.767,8.427,557.339,10.835, 157.423,17.173,3.433,153.984,1.144, 182.053,21.143,2.349,190.274,2.937, 208.…
uc001rld.2	A8K4X9	chr12	+	32896344	8	pla_solexa_sample_N1584812,pla_solexa_sample_N1584814,pla_solexa_sample_N1584817,pla_solexa_sample_N1584821,pla_solexa_sample_N1584822,pla_solexa_sample_N1584823,pla_solexa_sample_N1584827,pla_solexa_sample_N1584845,	32896397,32896542,32896715,32896922,32897017,32897125,32897302,32898480,	18.569,1480.948,10.894,22.458,261.848,12.469,39.405,1478.216,	none,multi,none,AAGAAA,ATTAAA,none,AATATA,AATAAA,	12	0.605,58.676,1.210,0.605,6.655,0.000,0.000,66.538, 1.261,111.629,0.000,2.523,28.380,0.631,3.785,87.661, 0.000,64.554,0.000,1.899,6.963,0.633,1.899,115.811, 1.476,99.681,1.476,0.738,19.195,1.476,0.738,80.488, 0.000,50.757,0.725,0.725,12.326,2.900,5.075,131.250, 2.139,166.846,0.713,5.704,22.816,0.000,4.991,178.970, 4.066,201.500,0.581,1.743,36.005,0.581,4.646,176.530, 0.000,67.652,0.705,0.705,9.162…
uc001rpa.2	AK027825	chr12	-	46582753	17	pla_solexa_sample_N1592503,pla_solexa_sample_N1592509,pla_solexa_sample_N1592515,pla_solexa_sample_N1592518,pla_solexa_sample_N1592519,pla_solexa_sample_N1592524,pla_solexa_sample_N1592529,pla_solexa_sample_N1592531,pla_solexa_sample_N1592533,pla_solexa_sample_N1592541,pla_solexa_sample_N1592542,pla_solexa_sample_N1592553,pla_solexa_sample_N1592558,pla_solexa_sample_N1592560,pla_solexa_sample_N15…	46576848,46577271,46577449,46577588,46577690,46577958,46578404,46578543,46579213,46580278,46580366,46581311,46581637,46581919,46582014,46582296,46582611,	5334.043,84.959,10.391,37.560,34.520,29.875,130.340,56.517,18.043,69.481,48.566,418.024,439.001,36.463,268.321,1170.493,12.502,	multi,AAGAAA,none,none,AATAAA,multi,none,multi,none,none,multi,none,TATAAA,AAGAAA,multi,none,none,	12	284.297,10.284,0.000,1.210,3.025,0.605,24.801,8.470,2.420,3.025,3.630,75.005,12.098,4.235,8.470,63.516,0.605, 421.898,3.784,0.000,2.523,0.631,1.893,5.046,3.785,1.262,1.262,1.893,16.398,16.397,3.155,7.570,46.041,0.000, 480.957,6.961,1.266,1.266,2.532,4.430,11.391,5.064,0.633,8.227,2.532,20.252,25.315,1.899,10.128,63.286,1.266, 472.582,12.553,0.738,4.430,2.215,4.429,21.413,5.166,2.953,10.338,5.905,…
uc001rqw.2		chr12	-	48439105	6	pla_solexa_sample_N1596376,pla_solexa_sample_N1596377,pla_solexa_sample_N1596380,pla_solexa_sample_N1596382,pla_solexa_sample_N1596384,pla_solexa_sample_N1596385,	48436676,48436977,48437200,48437347,48437557,48437699,	13.456,282.352,17.112,2584.638,1755.175,11.783,	ACTAAA,multi,none,AATAAA,AAGAAA,none,	12	0.000,22.988,0.000,139.729,162.716,1.210, 1.262,54.238,3.783,302.708,141.269,1.262, 0.633,12.026,1.899,124.669,120.242,1.266, 0.738,14.026,0.738,119.623,127.005,0.738, 1.450,19.577,0.725,107.320,105.141,0.000, 2.139,22.103,0.713,264.532,194.654,0.713, 1.743,20.325,2.323,216.016,153.305,1.742, 0.000,32.417,1.410,109.232,77.520,0.000, 1.204,24.077,1.806,364.737,255.804,1.204, 1.144,21.752,0.572,385…
uc001sfh.3	B2R8T9	chr12	-	54635539	20	pla_solexa_sample_N1604367,pla_solexa_sample_N1604372,pla_solexa_sample_N1604384,pla_solexa_sample_N1604391,pla_solexa_sample_N1604403,pla_solexa_sample_N1604409,pla_solexa_sample_N1604410,pla_solexa_sample_N1604412,pla_solexa_sample_N1604418,pla_solexa_sample_N1604421,pla_solexa_sample_N1604423,pla_solexa_sample_N1604437,pla_solexa_sample_N1604442,pla_solexa_sample_N1604447,pla_solexa_sample_N16…	54624734,54625058,54627101,54628339,54628950,54629787,54629829,54629993,54630427,54630855,54631051,54632668,54632960,54633364,54633858,54634087,54634777,54635111,54635230,54635409,	4876.240,20.414,11.844,19.479,10.989,14.661,14.794,74.742,93.949,38.241,243.440,20.463,19.692,96.429,19.415,206.056,95.570,14.079,71.494,659.581,	AATAAA,none,AGTAAA,AATAGA,none,multi,none,AATAAA,AATAAA,ATTAAA,AGTAAA,none,AATAGA,none,AATAAA,multi,GATAAA,none,none,multi,	12	176.627,6.049,2.420,2.420,1.210,0.605,3.025,1.815,5.445,3.630,10.283,1.210,3.025,10.889,1.210,5.445,2.420,1.210,3.025,35.689, 1186.227,1.261,2.523,3.784,1.261,3.154,3.785,8.829,12.615,5.046,20.813,0.631,0.631,9.460,1.262,34.686,6.939,1.892,5.677,46.669, 263.893,3.797,0.000,0.633,1.266,1.266,1.266,3.797,5.064,1.899,14.557,1.899,0.633,9.492,0.000,5.063,5.696,0.633,1.266,27.213, 239.985,1.476,0.000,…
uc001tcp.2	BLU	chr12	-	93803815	7	pla_solexa_sample_N1636533,pla_solexa_sample_N1636535,pla_solexa_sample_N1636545,pla_solexa_sample_N1636546,pla_solexa_sample_N1636550,pla_solexa_sample_N1636552,pla_solexa_sample_N1636559,	93802147,93802307,93802849,93802917,93803135,93803291,93803666,	7646.861,10.738,158.317,39.775,6856.658,74.629,140.117,	multi,CATAAA,multi,TATAAA,AGTAAA,ATTAAA,multi,	12	355.070,0.000,4.840,1.210,375.031,4.235,6.655, 688.025,2.522,13.243,6.308,715.773,11.352,14.505, 652.457,0.000,13.291,3.165,424.633,3.797,9.495, 516.151,1.476,10.336,2.953,520.581,8.122,14.765, 509.769,0.725,7.975,0.725,263.224,1.450,6.525, 728.000,1.426,16.399,2.139,382.895,4.278,12.121, 681.730,0.581,13.357,4.648,691.603,11.034,18.584, 512.334,0.000,10.570,0.705,563.777,7.752,9.161, 792.070,0.0…
uc001ubb.2	ARHF	chr12	-	122217404	4	pla_solexa_sample_N1665597,pla_solexa_sample_N1665604,pla_solexa_sample_N1665606,pla_solexa_sample_N1665609,	122215665,122216671,122216747,122217071,	895.218,10.386,95.108,953.367,	AATAAA,none,none,AATGAA,	12	75.612,2.420,7.259,89.525, 23.334,0.000,6.308,36.579, 31.010,1.266,7.595,67.716, 82.700,0.738,5.906,100.421, 47.134,0.000,2.175,51.483, 31.372,0.000,2.852,57.040, 163.175,1.161,17.423,102.782, 51.446,0.000,3.524,59.904, 238.344,0.602,9.029,117.369, 36.635,0.572,8.014,63.539, 71.646,2.349,20.555,116.280, 42.811,1.278,4.473,90.735,
uc001uco.2	AK001883	chr12	-	122990074	7	pla_solexa_sample_N1666791,pla_solexa_sample_N1666792,pla_solexa_sample_N1666793,pla_solexa_sample_N1666795,pla_solexa_sample_N1666797,pla_solexa_sample_N1666800,pla_solexa_sample_N1666801,	122989275,122989390,122989445,122989607,122989780,122989855,122989956,	1444.754,69.573,67.543,11197.639,25.484,11.622,19.002,	multi,ACTAAA,none,AATAAA,multi,ATTAAA,AATACA,	12	59.278,4.234,10.283,700.460,3.025,1.815,1.815, 166.490,5.676,2.522,554.962,2.523,0.631,1.262, 94.292,5.697,5.696,893.564,0.633,0.000,1.266, 133.653,8.859,6.645,937.788,2.953,0.738,3.690, 113.121,1.450,14.502,1360.358,1.450,0.000,1.450, 113.371,4.991,5.704,1279.170,1.426,0.000,0.713, 103.363,6.387,3.484,958.718,2.904,2.904,2.324, 78.224,0.705,4.933,670.189,2.819,0.705,2.820, 88.476,6.020,3.612,139…
uc001ukf.2	AUTS2L	chr12	+	133160364	4	pla_solexa_sample_N1672180,pla_solexa_sample_N1672183,pla_solexa_sample_N1672185,pla_solexa_sample_N1672187,	133160664,133160878,133161031,133161770,	312.482,4283.180,196.554,1585.925,	AAGAAA,ATTAAA,TATAAA,GATAAA,	12	24.802,203.243,9.680,71.981, 18.290,438.295,23.966,281.896, 20.885,268.323,15.190,83.536, 33.226,284.287,8.859,86.394, 23.929,271.201,14.500,132.700, 49.911,496.267,17.825,94.120, 23.809,526.106,20.907,115.556, 22.550,231.150,12.685,119.803, 37.920,510.996,28.892,45.743, 18.889,468.262,14.882,274.773, 15.268,314.775,17.030,215.527, 23.003,270.282,12.141,63.895,
uc001uuk.3	A3KME8	chr13	-	33091939	5	pla_solexa_sample_N1685515,pla_solexa_sample_N1685516,pla_solexa_sample_N1685524,pla_solexa_sample_N1685525,pla_solexa_sample_N1685526,	33091032,33091171,33091760,33091859,33091923,	1879.365,10.339,819.325,27.835,143.672,	ATTAAA,TATAAA,AATAAA,AATAAA,ATTAAA,	12	54.440,0.000,84.685,1.210,7.863, 229.552,0.631,45.408,1.262,10.092, 134.163,0.000,70.879,1.266,11.391, 133.650,2.954,103.377,2.215,16.243, 240.743,0.725,90.641,2.900,15.228, 153.299,0.000,53.476,2.139,7.130, 155.625,2.323,52.844,2.324,6.388, 102.185,0.705,85.273,4.935,19.027, 148.666,1.204,64.403,1.806,11.435, 248.441,0.572,44.649,2.289,10.875, 145.054,0.587,61.075,2.936,15.855, 133.544,0.639,62.…
uc001vos.2		chr13	-	101184384	2	pla_solexa_sample_N1728494,pla_solexa_sample_N1728495,	101183833,101184042,	2240.378,137.749,	multi,AATAAA,	12	182.679,0.000, 99.010,0.631, 120.875,0.000, 90.818,25.105, 255.972,0.725, 121.213,4.991, 198.597,17.421, 138.831,19.733, 176.955,22.269, 420.170,0.000, 267.205,26.427, 168.049,20.447,
uc001wlv.2	B3KQ83	chr14	+	24592518	2	pla_solexa_sample_N1741818,pla_solexa_sample_N1741825,	24593237,24594448,	6440.838,1201.653,	AATAAA,AATAAA,	12	519.599,135.494, 789.555,98.380, 430.329,149.984, 496.953,140.298, 390.124,84.839, 434.947,74.866, 336.801,64.457, 973.926,90.205, 282.883,59.587, 583.893,112.198, 682.992,91.027, 518.839,100.318,
uc001wuw.3	B4DZX8	chr14	+	39651067	10	pla_solexa_sample_N1752846,pla_solexa_sample_N1752847,pla_solexa_sample_N1752848,pla_solexa_sample_N1752850,pla_solexa_sample_N1752851,pla_solexa_sample_N1752859,pla_solexa_sample_N1752860,pla_solexa_sample_N1752862,pla_solexa_sample_N1752864,pla_solexa_sample_N1752865,	39651117,39651212,39651317,39651453,39651522,39652024,39652143,39652304,39652379,39652421,	11.021,254.955,543.002,277.386,58.654,14.883,2081.922,77.133,21.814,71.291,	none,AATACA,AATAAA,AATAAA,AATAAA,AATGAA,AATAAA,AGTAAA,none,ATTAAA,	12	0.000,13.914,38.711,16.333,3.025,2.420,71.985,1.815,4.235,1.210, 1.262,1.262,27.750,11.983,5.676,0.631,235.862,6.938,0.631,6.308, 0.000,12.025,44.932,26.581,5.064,0.000,113.911,3.164,2.532,6.330, 1.477,39.874,63.503,27.320,2.953,2.215,152.851,5.169,2.953,5.907, 2.900,34.805,50.759,42.782,5.800,3.626,204.488,2.900,2.175,5.800, 0.713,9.982,22.103,23.529,2.852,1.426,183.246,12.121,0.713,4.278, 1.162…
uc001wzi.2	GBG2_HUMAN	chr14	+	52433405	6	pla_solexa_sample_N1760741,pla_solexa_sample_N1760742,pla_solexa_sample_N1760745,pla_solexa_sample_N1760748,pla_solexa_sample_N1760767,pla_solexa_sample_N1760773,	52433637,52433755,52434034,52434130,52436258,52436511,	10.426,280.447,17.150,1683.271,329.733,13923.195,	AATAAA,ATTAAA,none,AGTAAA,multi,AATAAA,	12	1.210,11.494,0.605,125.215,29.640,1509.795, 0.631,52.345,3.155,218.833,24.597,775.683, 0.633,19.619,0.633,110.749,34.808,1945.972, 2.215,44.303,0.738,141.032,32.486,1452.462, 1.450,5.800,0.725,127.622,29.004,1395.889, 0.000,19.251,1.426,130.485,26.381,1345.483, 0.000,18.002,2.323,73.747,15.100,810.643, 0.705,6.342,2.115,107.822,20.437,997.885, 0.000,1.806,0.000,7.224,1.806,46.346, 1.717,42.932,2.…
uc001xbq.1	B2RDD8	chr14	+	55531345	13	pla_solexa_sample_N1764120,pla_solexa_sample_N1764122,pla_solexa_sample_N1764123,pla_solexa_sample_N1764130,pla_solexa_sample_N1764136,pla_solexa_sample_N1764139,pla_solexa_sample_N1764144,pla_solexa_sample_N1764157,pla_solexa_sample_N1764165,pla_solexa_sample_N1764166,pla_solexa_sample_N1764167,pla_solexa_sample_N1764172,pla_solexa_sample_N1764174,	55531547,55531614,55531779,55532069,55532641,55532930,55533374,55534881,55536075,55536262,55536357,55536674,55536911,	48.897,19.474,124.128,32.200,785.743,9139.474,54.214,23.520,19.065,1376.517,15.757,80.569,15.757,	multi,GATAAA,AATAAA,ATTAAA,AATAAA,multi,AATATA,multi,TATAAA,GATAAA,AAGAAA,ATTAAA,none,	12	2.420,1.815,4.840,0.605,51.418,375.637,11.493,1.815,0.000,112.510,1.815,6.655,0.605, 5.046,1.893,4.416,1.893,36.580,484.960,1.893,0.000,3.155,88.923,0.000,6.938,0.000, 3.798,1.899,13.923,1.899,74.678,707.513,2.532,0.633,1.899,162.642,1.266,6.329,2.532, 3.691,0.738,9.596,5.906,78.270,644.630,7.383,1.476,5.905,146.939,0.738,11.813,1.476, 2.175,2.175,7.975,2.175,42.057,482.215,5.075,1.450,0.000,108.…
uc001xhv.1	CHURC1	chr14	+	65398948	10	pla_solexa_sample_N1775087,pla_solexa_sample_N1775091,pla_solexa_sample_N1775093,pla_solexa_sample_N1775097,pla_solexa_sample_N1775098,pla_solexa_sample_N1775101,pla_solexa_sample_N1775105,pla_solexa_sample_N1775110,pla_solexa_sample_N1775118,pla_solexa_sample_N1775120,	65399027,65399337,65399505,65399972,65400011,65400285,65400744,65401167,65401634,65401709,	6599.566,35.127,51.772,13.419,36.403,12.583,30.518,31.510,334.568,1473.515,	AATACA,none,multi,none,AAGAAA,AATACA,none,none,none,none,	12	437.335,1.210,5.445,1.815,6.049,1.815,3.025,6.049,27.223,17.542, 664.063,1.261,5.677,0.000,1.892,0.631,2.522,1.892,26.492,11.981, 515.767,6.962,4.431,1.266,2.532,1.266,1.899,1.266,37.973,14.556, 612.146,5.907,8.858,2.953,4.430,0.738,4.429,4.429,37.655,17.720, 438.705,6.525,5.800,0.725,3.626,1.450,0.000,3.625,34.804,12.327, 444.927,0.000,2.139,0.000,0.713,0.713,0.000,2.139,27.807,9.982, 483.133,1.…
uc001xll.2	BC040209	chr14	+	70238178	5	pla_solexa_sample_N1782963,pla_solexa_sample_N1782964,pla_solexa_sample_N1782966,pla_solexa_sample_N1782967,pla_solexa_sample_N1782968,	70238386,70238482,70238530,70238578,70238720,	2868.824,67.486,18.347,177.345,2900.102,	ATTAAA,ACTAAA,TATAAA,multi,AATAAA,	12	226.832,9.679,0.000,15.123,134.889, 177.840,6.937,1.893,10.091,343.698, 183.524,3.797,1.266,6.962,214.531, 256.969,9.598,2.215,21.411,288.720, 421.304,6.526,1.450,13.777,271.201, 226.029,2.852,1.426,6.417,123.353, 220.662,1.742,2.323,14.518,293.829, 284.710,8.456,3.523,22.553,338.972, 167.925,3.010,0.000,5.418,237.140, 171.160,4.007,0.572,13.738,188.333, 338.265,7.047,1.762,21.141,323.583, 193.60…
uc001xyl.1	CALM	chr14	+	90871061	12	pla_solexa_sample_N1800067,pla_solexa_sample_N1800070,pla_solexa_sample_N1800072,pla_solexa_sample_N1800073,pla_solexa_sample_N1800075,pla_solexa_sample_N1800078,pla_solexa_sample_N1800081,pla_solexa_sample_N1800082,pla_solexa_sample_N1800096,pla_solexa_sample_N1800101,pla_solexa_sample_N1800104,pla_solexa_sample_N1800105,	90871180,90871304,90871449,90871763,90871950,90872439,90872617,90872713,90874199,90874394,90874476,90874609,	286.586,2824.460,1764.225,149.296,9659.586,19.367,212.721,66.256,36.962,1877.651,45.276,14566.836,	AAGAAA,multi,multi,AAGAAA,multi,none,multi,AATGAA,AATATA,ATTAAA,none,multi,	12	16.333,166.346,93.155,21.172,733.727,0.000,16.333,5.445,2.420,168.157,5.444,1158.961, 15.138,163.339,87.663,7.570,468.564,0.000,10.723,4.416,3.154,81.982,2.523,909.379, 42.404,308.195,203.144,17.721,1364.397,0.633,26.580,3.164,3.164,231.619,6.328,1883.953, 31.010,327.116,220.784,14.765,997.596,0.738,15.504,2.952,2.954,210.447,7.384,1688.756, 22.477,184.908,158.803,12.326,843.333,1.450,14.501,13.0…
uc001xzu.3	C14orf47	chr14	-	92249444	14	pla_solexa_sample_N1802008,pla_solexa_sample_N1802009,pla_solexa_sample_N1802017,pla_solexa_sample_N1802018,pla_solexa_sample_N1802020,pla_solexa_sample_N1802021,pla_solexa_sample_N1802025,pla_solexa_sample_N1802026,pla_solexa_sample_N1802028,pla_solexa_sample_N1802034,pla_solexa_sample_N1802036,pla_solexa_sample_N1802037,pla_solexa_sample_N1802038,pla_solexa_sample_N1802040,	92246393,92246446,92247149,92247304,92247443,92247524,92247916,92248020,92248146,92248583,92248644,92248847,92248940,92249160,	1972.766,200.984,81.493,409.904,297.777,902.561,27.633,51.574,275.843,83.895,472.719,45.595,307.765,729.344,	multi,multi,multi,AATAAA,AATATA,multi,multi,none,AATAAA,none,multi,AATAGA,AATGAA,multi,	12	215.341,18.148,4.235,38.109,28.431,71.379,3.630,9.678,33.270,5.445,32.061,3.630,26.013,79.242, 109.100,6.938,1.262,30.905,16.396,48.561,0.000,1.892,12.614,1.892,20.813,2.523,5.677,27.119, 236.053,27.848,6.962,46.199,33.542,108.218,1.899,1.266,24.682,13.924,56.326,3.165,46.832,62.024, 171.305,19.196,6.645,45.780,28.797,67.930,0.000,5.169,15.507,5.907,42.088,4.429,30.273,99.682, 290.051,29.002,14.5…
uc001ymz.3	CTAK1	chr14	+	103969564	5	pla_solexa_sample_N1812711,pla_solexa_sample_N1812713,pla_solexa_sample_N1812715,pla_solexa_sample_N1812716,pla_solexa_sample_N1812717,	103969617,103969758,103970030,103970097,103970163,	2613.672,32.244,36.107,37.452,2524.583,	ATTAAA,ATTAAA,AATACA,none,ATTAAA,	12	254.054,0.000,2.420,2.420,127.632, 118.561,0.000,3.784,2.524,213.155, 250.607,3.797,3.165,3.165,192.382, 269.516,6.645,4.431,3.691,232.599, 256.692,3.625,2.900,3.625,224.791, 217.471,2.852,2.852,2.852,189.666, 210.212,1.742,2.324,1.162,200.339, 174.772,2.114,0.705,4.934,169.838, 166.726,4.816,1.204,3.010,260.612, 247.864,0.572,6.297,4.579,251.874, 211.417,3.524,4.111,2.936,257.221, 235.780,2.556,…
uc002afn.2	BC040120	chr15	-	59172198	4	pla_solexa_sample_N1849590,pla_solexa_sample_N1849593,pla_solexa_sample_N1849596,pla_solexa_sample_N1849597,	59171252,59171625,59171903,59171961,	6582.890,5587.338,48.107,21.843,	AATAAA,AATAAA,TATAAA,none,	12	438.544,326.638,3.025,6.654, 804.060,472.347,5.677,0.631, 644.858,467.034,2.532,0.000, 623.222,598.854,5.906,5.906, 636.670,390.849,2.175,2.900, 519.082,378.618,2.139,1.426, 420.420,489.523,4.645,0.581, 770.259,424.243,2.115,0.705, 246.168,499.558,8.426,0.602, 389.262,419.602,4.006,0.572, 584.918,573.760,2.348,0.587, 505.421,546.316,5.112,1.278,
uc002ama.2	A8K589	chr15	+	63597980	2	pla_solexa_sample_N1854873,pla_solexa_sample_N1854886,	63598111,63601316,	1026.726,1506.331,	AATAAA,multi,	12	58.674,157.271, 72.526,63.695, 99.990,224.659, 91.563,152.851, 66.713,152.279, 71.302,110.519, 84.202,130.075, 76.109,92.319, 42.133,53.567, 119.069,88.155, 119.215,125.676, 125.239,155.269,
uc002aqj.2	A8K4B6	chr15	+	67482874	4	pla_solexa_sample_N1860772,pla_solexa_sample_N1860777,pla_solexa_sample_N1860796,pla_solexa_sample_N1860804,	67483847,67484259,67486686,67487502,	3754.639,10.223,25.467,4577.036,	ATTAAA,none,none,AATAAA,	12	120.374,0.000,4.234,221.390, 440.817,0.631,1.893,1038.028, 292.373,0.633,0.000,382.867, 254.014,1.477,6.645,332.285, 276.277,2.175,3.626,351.690, 313.017,3.565,1.426,350.095, 412.291,1.743,1.162,317.057, 159.268,0.000,3.523,353.772, 593.450,0.000,0.602,235.938, 344.040,0.000,1.717,321.711, 226.686,0.000,0.000,428.117, 322.040,0.000,0.639,244.085,
uc002arl.2	AN32A_HUMAN	chr15	-	69072420	6	pla_solexa_sample_N1862852,pla_solexa_sample_N1862854,pla_solexa_sample_N1862857,pla_solexa_sample_N1862862,pla_solexa_sample_N1862867,pla_solexa_sample_N1862872,	69070877,69071037,69071248,69071487,69071736,69072214,	910.702,14.459,4953.347,38.573,38.904,1156.589,	TATAAA,ATTAAA,AATAAA,none,ATTAAA,AATAAA,	12	53.229,0.000,277.038,1.815,5.445,99.202, 116.669,1.261,368.924,2.523,3.786,72.525, 87.333,1.266,427.798,7.596,1.266,24.681, 63.503,0.738,429.757,3.691,3.690,124.791, 53.660,1.450,320.510,3.625,7.975,52.934, 48.485,1.426,427.105,2.139,2.139,57.755, 106.848,0.581,595.791,4.645,1.743,56.909, 83.862,0.000,249.471,2.114,2.115,217.054, 107.134,2.408,730.678,6.019,5.418,223.898, 59.532,2.289,370.374,0.5…
uc002aut.3	ARI	chr15	+	72875633	13	pla_solexa_sample_N1866762,pla_solexa_sample_N1866763,pla_solexa_sample_N1866767,pla_solexa_sample_N1866769,pla_solexa_sample_N1866783,pla_solexa_sample_N1866784,pla_solexa_sample_N1866785,pla_solexa_sample_N1866786,pla_solexa_sample_N1866788,pla_solexa_sample_N1866791,pla_solexa_sample_N1866793,pla_solexa_sample_N1866794,pla_solexa_sample_N1866795,	72875822,72875883,72876187,72876342,72877705,72877839,72877889,72877951,72878116,72878391,72878545,72878623,72878894,	2110.963,76.124,61.482,319.603,161.847,10.132,37.507,61.408,10.167,12.786,70.585,11.617,4163.737,	multi,ACTAAA,none,none,ATTAAA,none,none,CATAAA,none,AATAAA,AATAAA,AATAAA,AATAAA,	12	111.302,0.605,5.444,23.593,14.518,0.000,1.210,3.025,0.000,1.210,1.815,2.420,332.080, 143.158,6.307,7.568,35.947,18.291,2.523,6.937,17.658,1.892,2.524,10.092,0.000,577.035, 129.737,3.165,5.063,19.622,12.025,0.000,0.000,3.798,1.266,1.266,6.330,1.899,353.756, 174.262,3.691,8.861,20.673,18.459,0.738,0.000,2.215,2.214,2.214,8.121,0.738,310.133, 142.124,3.625,7.977,17.402,10.876,0.000,1.450,10.152,0.72…
uc002bfu.2	ABHD17C	chr15	+	81046711	4	pla_solexa_sample_N1875605,pla_solexa_sample_N1875610,pla_solexa_sample_N1875611,pla_solexa_sample_N1875615,	81047299,81047617,81047677,81047958,	78.936,1607.363,517.014,5909.412,	TATAAA,multi,ATTAAA,AATAAA,	12	1.210,23.591,10.888,280.668, 15.766,204.327,67.479,984.424, 5.696,69.614,31.643,309.457, 5.907,48.734,15.506,328.594, 7.976,70.340,26.829,229.143, 7.843,93.405,33.512,512.667, 11.034,216.019,65.618,618.435, 4.228,92.319,35.237,448.204, 12.640,474.282,128.200,932.909, 1.144,85.865,30.912,403.573, 2.936,107.467,40.522,268.381, 2.556,121.404,30.670,592.958,
uc002dbp.1	CATX11	chr16	-	11931644	4	pla_solexa_sample_N1902142,pla_solexa_sample_N1902143,pla_solexa_sample_N1902148,pla_solexa_sample_N1902159,	11928058,11928163,11928604,11931212,	486.130,2063.674,10.251,4880.713,	CATAAA,multi,TATAAA,AATAAA,	12	12.703,119.165,0.000,298.817, 59.282,188.562,1.262,261.085, 70.246,225.924,0.633,428.431, 31.751,146.942,1.477,288.719, 23.205,150.103,0.000,185.633, 47.773,166.846,0.713,258.116, 54.004,173.046,0.581,813.549, 28.190,121.213,1.410,228.330, 46.344,184.777,1.806,1140.558, 38.925,207.796,1.145,284.501, 26.427,169.721,0.587,250.174, 47.284,209.581,0.639,442.803,
uc002dlv.2	A8MW58	chr16	+	23581911	2	pla_solexa_sample_N1911595,pla_solexa_sample_N1911608,	23582178,23585707,	607.400,3482.048,	AATAAA,ATTAAA,	12	53.836,163.925, 22.074,413.700, 32.908,162.641, 45.042,176.480, 24.654,183.460, 54.903,327.279, 85.363,363.511, 20.437,279.773, 95.098,616.320, 63.539,303.967, 47.568,221.988, 61.979,269.005,
uc002dmm.2	C9JAR8	chr16	+	24835128	6	pla_solexa_sample_N1913451,pla_solexa_sample_N1913455,pla_solexa_sample_N1913456,pla_solexa_sample_N1913457,pla_solexa_sample_N1913463,pla_solexa_sample_N1913464,	24836454,24836709,24836776,24836889,24837534,24837596,	23.773,38.075,9269.128,11.946,10518.141,47.896,	TATAAA,AATAGA,AATAAA,ATTAAA,AATAAA,AATAAA,	12	2.420,3.025,487.536,1.210,834.745,1.210, 1.261,1.893,745.414,0.000,1022.894,4.415, 1.899,1.266,599.297,2.532,714.475,1.266, 2.953,2.214,880.929,0.738,695.585,5.906, 5.800,3.625,736.015,0.725,1693.921,3.625, 2.139,3.565,742.975,1.426,1280.598,3.565, 1.742,7.549,814.129,0.581,567.336,2.904, 0.705,0.705,508.809,0.000,928.120,6.343, 1.204,2.408,562.755,1.806,879.342,2.408, 1.144,6.868,992.621,2.289,5…
uc002ffz.1	A8K4H8	chr16	+	81078575	3	pla_solexa_sample_N1944768,pla_solexa_sample_N1944787,pla_solexa_sample_N1944788,	81078778,81080840,81080951,	2528.533,1501.176,877.854,	TATAAA,multi,GATAAA,	12	117.953,112.514,59.886, 343.068,145.049,97.750, 210.103,161.376,94.927, 165.402,132.174,58.334, 176.206,135.598,86.290, 199.646,166.133,84.849, 252.602,84.203,66.780, 138.127,110.640,56.379, 258.208,67.412,46.949, 204.361,110.480,72.699, 214.941,99.248,54.616, 247.921,176.355,98.402,
uc002fxs.2	B2R7P2	chr17	-	4175811	7	pla_solexa_sample_N1956839,pla_solexa_sample_N1956851,pla_solexa_sample_N1956855,pla_solexa_sample_N1956857,pla_solexa_sample_N1956867,pla_solexa_sample_N1956868,pla_solexa_sample_N1956871,	4172556,4174128,4174612,4174731,4175327,4175364,4175524,	9781.649,166.201,12.019,7814.483,407.888,19.604,48.690,	AATAAA,AATAAA,AATGAA,AATATA,ATTAAA,ATTAAA,multi,	12	453.063,12.099,0.000,427.051,16.937,1.210,1.210, 1113.073,14.507,2.522,788.926,34.055,1.262,3.785, 828.386,11.394,0.633,719.537,36.705,1.266,3.165, 670.482,12.552,1.476,689.680,48.735,1.476,3.690, 574.309,13.051,0.725,431.457,21.028,1.450,5.075, 542.612,12.121,0.000,566.142,26.381,1.426,2.139, 1088.213,12.777,1.742,688.700,27.293,1.743,4.065, 539.817,13.392,0.000,396.757,28.894,0.705,3.524, 1347.…
uc002gbi.2	AK057142	chr17	-	5118022	3	pla_solexa_sample_N1958154,pla_solexa_sample_N1958155,pla_solexa_sample_N1958156,	5116159,5116237,5116308,	231.179,123.648,283.031,	TATAAA,none,none,	12	4.235,0.000,119.768, 8.830,7.568,0.631, 34.174,14.555,0.000, 27.320,13.291,0.738, 18.128,7.251,108.045, 22.816,17.825,0.713, 21.486,11.615,6.969, 13.390,9.162,10.570, 0.602,0.602,0.000, 13.738,12.021,1.144, 43.457,17.617,0.587, 23.003,12.141,33.865,
uc002gby.1	C1QBP	chr17	-	5336335	3	pla_solexa_sample_N1958884,pla_solexa_sample_N1958887,pla_solexa_sample_N1958890,	5335958,5336055,5336100,	1823.307,14.738,14427.640,	multi,none,CATAAA,	12	142.754,3.025,566.177, 94.598,0.631,1655.420, 41.768,0.000,704.351, 45.780,0.738,733.243, 58.011,0.000,464.810, 180.395,0.713,531.204, 221.823,0.581,2484.192, 106.414,0.000,677.943, 374.369,5.418,3431.905, 242.717,1.717,1264.530, 98.074,0.000,912.614, 216.611,1.917,1001.257,
uc002ghu.2	B4DVT4	chr17	+	7484829	3	pla_solexa_sample_N1961296,pla_solexa_sample_N1961302,pla_solexa_sample_N1961305,	7484949,7485289,7485427,	48.914,391.785,4302.850,	AAGAAA,AATAAA,ATTAAA,	12	1.210,11.493,312.727, 6.939,57.389,39.101, 0.633,31.644,600.563, 0.000,13.290,398.745, 2.175,21.753,287.880, 6.417,30.659,741.549, 2.904,17.422,142.269, 7.048,42.989,283.298, 1.204,6.622,115.562, 5.722,40.069,285.077, 7.634,33.474,200.259, 7.029,84.982,895.827,
uc002ihz.2	A8K7C1	chr17	+	43183007	3	pla_solexa_sample_N1995355,pla_solexa_sample_N1995365,pla_solexa_sample_N1995367,	43183340,43186180,43186377,	1556.293,14.650,903.676,	multi,ATTAAA,AATAAA,	12	152.437,1.210,79.846, 126.131,1.261,137.479, 74.678,0.633,46.829, 145.463,2.953,33.228, 55.109,0.000,53.659, 116.221,1.426,84.137, 220.664,1.162,33.098, 61.314,0.705,155.743, 251.590,0.000,37.317, 137.383,3.434,84.721, 94.550,0.587,82.217, 120.767,1.278,75.399,
uc002iof.2	B2RBT0	chr17	+	46940367	8	pla_solexa_sample_N2000610,pla_solexa_sample_N2000614,pla_solexa_sample_N2000619,pla_solexa_sample_N2000620,pla_solexa_sample_N2000621,pla_solexa_sample_N2000622,pla_solexa_sample_N2000624,pla_solexa_sample_N2000626,	46940429,46940849,46941086,46941239,46941353,46941398,46942119,46942227,	1228.506,29.580,35.850,3976.798,530.681,19.572,312.473,524.454,	AATAGA,none,none,AATAAA,AATAAA,none,GATAAA,AATAAA,	12	71.378,4.235,1.815,322.408,38.110,1.815,39.318,26.616, 57.390,3.153,4.416,455.954,79.461,3.784,32.164,97.749, 58.222,1.899,1.899,339.840,34.807,0.000,40.503,39.869, 64.241,2.214,1.476,307.176,35.442,2.215,24.365,27.319, 52.935,1.450,3.625,221.160,26.104,0.725,20.303,33.355, 74.867,3.565,3.565,345.104,50.624,4.278,30.659,45.634, 97.555,2.903,2.904,271.765,37.165,1.162,18.583,35.422, 51.445,4.228,0…
uc002iqm.2	CO1A1_HUMAN	chr17	-	48262863	5	pla_solexa_sample_N2002151,pla_solexa_sample_N2002154,pla_solexa_sample_N2002160,pla_solexa_sample_N2002161,pla_solexa_sample_N2002163,	48261466,48261675,48262600,48262667,48262774,	13311.925,15.153,766.317,131.337,35.481,	AATAAA,none,AATAAA,none,none,	12	125.214,0.000,16.937,4.840,0.000, 1039.291,0.631,17.028,9.460,0.631, 260.098,0.633,60.751,8.860,2.532, 182.388,0.000,28.798,4.430,1.476, 277.002,0.000,31.906,7.976,2.175, 3859.619,11.408,258.116,64.172,20.677, 2641.559,0.000,92.913,8.129,0.581, 305.849,0.705,23.960,4.934,0.705, 3472.226,1.204,130.608,2.408,0.602, 471.693,0.572,24.616,3.434,1.144, 366.453,0.000,27.014,8.222,1.762, 310.537,0.000,53…
uc002ita.2	HLC6	chr17	-	49043633	7	pla_solexa_sample_N2002911,pla_solexa_sample_N2002916,pla_solexa_sample_N2002929,pla_solexa_sample_N2002930,pla_solexa_sample_N2002933,pla_solexa_sample_N2002935,pla_solexa_sample_N2002942,	49039537,49040099,49041283,49041595,49042116,49042528,49043012,	1716.284,10.968,34.244,17.022,31.671,17.623,563.814,	TATAAA,AATAAA,multi,multi,none,none,multi,	12	88.919,0.605,2.420,2.420,8.469,5.445,30.851, 26.487,1.262,5.047,1.892,2.523,1.893,46.670, 231.618,0.633,2.532,0.633,1.266,1.899,37.974, 118.884,0.738,2.953,1.476,1.477,0.738,30.272, 239.295,0.725,3.625,2.175,4.351,0.725,35.530, 352.948,1.426,2.139,2.139,3.565,0.713,54.901, 92.328,0.581,3.485,1.742,1.161,1.162,58.069, 69.768,1.410,1.409,2.114,3.524,1.410,40.169, 263.625,1.806,3.612,1.204,1.806,1.2…
uc002jnx.3	ASH	chr17	-	73316449	5	pla_solexa_sample_N2025213,pla_solexa_sample_N2025214,pla_solexa_sample_N2025232,pla_solexa_sample_N2025233,pla_solexa_sample_N2025235,	73314159,73314233,73316000,73316095,73316229,	9541.136,600.581,13.920,2406.300,27.321,	AATAAA,AATAAA,none,multi,TATAAA,	12	864.383,53.835,0.000,243.773,0.605, 667.845,57.390,1.262,247.844,3.154, 960.013,42.402,1.266,113.279,0.633, 880.929,64.979,0.738,194.203,2.953, 668.575,29.730,1.450,81.940,2.175, 976.134,57.041,3.565,242.429,2.139, 673.020,52.265,0.000,177.111,0.581, 597.605,24.666,0.705,161.382,2.820, 476.087,35.512,1.204,142.044,1.204, 869.545,56.673,0.000,247.295,1.144, 954.309,62.838,1.175,227.859,3.523, 952.…
uc002jsg.3	NM_006456	chr17	-	74562186	3	pla_solexa_sample_N2026802,pla_solexa_sample_N2026803,pla_solexa_sample_N2026807,	74561462,74561712,74561956,	1045.532,315.437,17.921,	multi,multi,AATACA,	12	1.815,12.098,0.605, 5.676,66.218,2.524, 126.569,17.089,1.899, 79.010,13.291,0.738, 5.800,6.526,1.450, 245.994,52.049,2.139, 22.647,9.873,0.000, 164.199,29.598,1.410, 2.408,4.214,1.204, 329.152,54.952,2.861, 4.110,3.523,1.174, 58.146,46.007,1.917,
uc002jwe.2	BC039613	chr17	-	76851749	7	pla_solexa_sample_N2029253,pla_solexa_sample_N2029257,pla_solexa_sample_N2029261,pla_solexa_sample_N2029262,pla_solexa_sample_N2029264,pla_solexa_sample_N2029275,pla_solexa_sample_N2029276,	76849068,76849320,76849446,76849542,76849609,76851632,76851719,	8786.787,5342.060,92.804,97.416,184.936,606.189,27.710,	AATAAA,multi,AATAAA,none,AGTAAA,AATAAA,none,	12	712.553,162.111,2.420,22.381,15.122,40.530,1.815, 494.420,406.134,6.939,3.785,10.721,53.605,1.893, 976.468,458.176,8.862,8.227,13.925,47.463,3.165, 472.586,251.059,5.906,5.907,11.075,39.873,5.168, 614.915,315.432,7.251,18.128,8.701,30.456,0.725, 1023.195,646.001,13.547,11.408,33.511,62.744,2.139, 689.861,567.334,9.872,6.388,16.839,58.650,2.323, 1212.122,374.206,7.752,9.865,16.208,31.008,1.409, 62…
uc002kvh.3	A8MXG0	chr18	+	22030811	6	pla_solexa_sample_N2049632,pla_solexa_sample_N2049636,pla_solexa_sample_N2049638,pla_solexa_sample_N2049644,pla_solexa_sample_N2049645,pla_solexa_sample_N2049647,	22030969,22031555,22031825,22033208,22033249,22033491,	17.468,2249.823,10.118,61.119,20.268,1001.132,	AATAGA,multi,none,none,AAGAAA,AATAAA,	12	2.420,67.143,0.000,3.025,1.815,37.504, 3.153,231.446,3.784,10.092,6.938,185.409, 0.000,147.453,0.000,4.431,1.266,83.535, 1.477,150.634,0.738,5.907,1.476,73.102, 2.900,121.824,2.175,5.801,1.450,66.711, 0.713,196.083,0.000,1.426,1.426,91.268, 0.000,217.178,0.000,5.227,2.904,46.455, 1.410,124.031,2.819,3.524,0.705,73.292, 0.602,189.593,0.602,3.010,0.000,28.289, 2.288,356.631,0.000,10.303,2.290,149.4…
uc002lgy.2	KIAA0439	chr18	+	56063501	8	pla_solexa_sample_N2071024,pla_solexa_sample_N2071026,pla_solexa_sample_N2071030,pla_solexa_sample_N2071031,pla_solexa_sample_N2071032,pla_solexa_sample_N2071037,pla_solexa_sample_N2071047,pla_solexa_sample_N2071050,	56063804,56063933,56064549,56064635,56064881,56065681,56068410,56068759,	2439.126,317.897,11.881,974.551,1818.948,59.518,22.179,76.502,	multi,ATTAAA,none,multi,ATTAAA,none,none,AATAAA,	12	69.564,6.654,1.815,30.245,68.355,3.629,0.000,1.815, 176.580,28.379,2.524,101.536,274.331,8.199,3.783,15.766, 144.289,15.189,0.000,53.161,86.071,1.266,2.532,3.798, 135.868,14.768,0.000,40.612,83.431,5.907,0.000,3.691, 153.003,21.029,2.175,76.137,100.790,2.175,1.450,2.175, 152.587,17.112,0.713,81.284,238.146,3.565,0.713,4.278, 366.999,31.356,1.162,95.235,171.305,5.227,2.323,7.548, 100.072,15.504,0.…
uc002lxi.2	D6W613	chr19	+	3207686	3	pla_solexa_sample_N2085282,pla_solexa_sample_N2085284,pla_solexa_sample_N2085290,	3207853,3208027,3209568,	131.500,278.302,2098.867,	none,ATTAAA,AATAAA,	12	22.381,21.171,134.890, 3.785,15.766,196.761, 13.290,20.885,86.703, 11.813,9.598,123.315, 3.625,13.778,150.828, 19.964,41.355,175.404, 8.130,18.582,242.148, 20.437,37.349,114.163, 7.224,29.494,423.121, 17.171,34.918,164.290, 1.761,18.792,133.899, 1.917,16.613,153.353,
uc002myz.1	DNAJ1	chr19	-	14626752	3	pla_solexa_sample_N2096154,pla_solexa_sample_N2096155,pla_solexa_sample_N2096167,	14625583,14625750,14626591,	9654.770,14.120,829.226,	ATTAAA,none,none,	12	574.037,1.210,48.996, 2196.508,2.524,88.289, 363.881,0.633,38.604, 373.637,2.215,60.551, 525.723,0.000,44.960, 687.358,0.713,48.485, 542.365,0.000,107.428, 1524.310,1.410,35.237, 403.258,2.408,119.172, 1081.923,1.144,105.904, 910.852,0.587,72.821, 470.919,1.278,58.786,
uc002npq.1	KOX8	chr19	-	21476076	3	pla_solexa_sample_N2103026,pla_solexa_sample_N2103033,pla_solexa_sample_N2103039,	21473963,21475411,21475867,	256.434,42.738,17.024,	AATAAA,multi,multi,	12	2.420,4.840,0.605, 1.893,2.523,0.000, 1.266,5.697,1.899, 4.430,2.952,2.214, 2.901,5.075,2.175, 19.251,4.991,3.565, 1.742,1.161,1.162, 113.460,2.115,3.523, 0.602,0.000,0.602, 38.926,4.006,0.000, 1.175,2.348,0.000, 68.370,7.029,1.278,
uc002nps.3	A8K4N7	chr19	+	21560285	6	pla_solexa_sample_N2103171,pla_solexa_sample_N2103173,pla_solexa_sample_N2103186,pla_solexa_sample_N2103187,pla_solexa_sample_N2103192,pla_solexa_sample_N2103202,	21560383,21560630,21562103,21562481,21565816,21571382,	40.231,47.129,1934.517,15.941,75.548,135.223,	AATAAA,AATAAA,ATTAAA,AATAAA,multi,AATAAA,	12	1.210,0.605,63.515,0.605,6.655,15.728, 3.784,9.460,715.143,4.415,9.463,18.921, 3.165,1.899,55.693,0.633,11.394,10.126, 0.000,5.168,105.592,5.908,12.549,28.058, 7.977,3.625,75.413,0.725,7.250,10.877, 5.704,4.278,89.127,0.713,4.278,6.417, 1.162,1.743,37.163,0.000,4.646,6.388, 2.114,2.820,252.293,0.000,4.229,11.276, 0.000,0.000,4.214,0.000,0.000,0.000, 5.151,4.579,264.467,1.717,2.289,5.723, 2.936,5.…
uc002odq.3	NM_007145	chr19	+	36728221	10	pla_solexa_sample_N2110223,pla_solexa_sample_N2110224,pla_solexa_sample_N2110225,pla_solexa_sample_N2110226,pla_solexa_sample_N2110227,pla_solexa_sample_N2110228,pla_solexa_sample_N2110231,pla_solexa_sample_N2110234,pla_solexa_sample_N2110235,pla_solexa_sample_N2110236,	36728534,36728639,36728801,36728973,36729052,36729181,36729286,36729477,36729569,36729666,	55.380,304.998,233.147,62.054,16.428,43.594,12.594,21.299,109.897,5897.947,	AAGAAA,none,multi,none,AATGAA,ATTAAA,none,none,multi,ATTAAA,	12	16.938,37.504,36.295,4.234,0.605,0.605,1.210,2.420,10.283,324.826, 7.570,37.839,34.689,6.306,3.784,6.308,1.893,2.523,18.921,1187.489, 2.532,22.152,12.658,6.961,0.633,1.266,2.532,1.899,7.595,341.731, 8.121,40.611,25.105,4.430,0.000,2.215,2.214,2.215,5.907,345.579, 4.350,34.805,26.102,6.525,1.450,4.350,0.000,2.175,5.800,263.949, 1.426,34.937,15.686,2.139,1.426,2.852,2.852,0.713,7.130,312.306, 4.066…
uc002okc.2	MRPS12	chr19	+	39423340	2	pla_solexa_sample_N2114509,pla_solexa_sample_N2114510,	39423656,39423806,	7060.484,1015.209,	AATAAA,ATTAAA,	12	378.054,119.767, 563.158,155.138, 411.977,61.388, 386.930,57.595, 354.591,43.507, 518.370,77.719, 866.970,87.103, 319.238,43.692, 1454.738,96.302, 751.620,153.986, 429.292,41.696, 625.547,77.315,
uc002oxa.2	C19orf37	chr19	-	44111769	2	pla_solexa_sample_N2119058,pla_solexa_sample_N2119061,	44111378,44111611,	1702.029,2419.110,	AATAGA,AATAAA,	12	64.722,230.461, 250.365,215.050, 153.146,251.871, 89.347,129.220, 123.997,263.224, 131.910,211.055, 118.461,128.331, 225.512,356.589, 136.025,181.166, 117.351,118.494, 176.179,202.019, 115.014,131.627,
uc002pbq.1	ASE1	chr19	+	45912759	2	pla_solexa_sample_N2121649,pla_solexa_sample_N2121657,	45913040,45913988,	49.170,1788.508,	ATTAAA,AATAAA,	12	4.840,9.679, 1.262,308.385, 0.633,80.372, 2.214,96.731, 1.450,48.585, 6.417,178.255, 8.709,268.278, 1.410,99.366, 15.650,502.567, 1.144,75.562, 3.523,7.634, 1.917,113.098,
uc002pck.3	NM_025136	chr19	-	46056772	6	pla_solexa_sample_N2121886,pla_solexa_sample_N2121889,pla_solexa_sample_N2121890,pla_solexa_sample_N2121898,pla_solexa_sample_N2121899,pla_solexa_sample_N2121900,	46052413,46054398,46054619,46056332,46056382,46056488,	375.745,18.099,215.678,12.053,16.406,52.295,	AATAAA,AATAAA,AATAAA,none,none,AATGAA,	12	21.171,1.815,2.420,3.025,0.000,7.260, 37.209,0.631,4.415,0.000,0.000,2.524, 23.417,1.266,3.165,0.633,1.266,1.899, 42.088,2.954,4.430,0.738,0.000,2.214, 20.304,0.000,0.725,0.725,1.450,4.350, 29.946,1.426,2.139,0.713,2.139,1.426, 24.389,2.323,65.619,0.581,2.904,6.388, 46.511,0.000,4.229,0.705,1.410,2.820, 42.735,2.408,114.358,1.204,4.214,13.243, 23.468,2.289,8.584,0.000,0.572,4.577, 29.365,2.350,1.…
uc002qfk.1	CD305	chr19	-	54866877	3	pla_solexa_sample_N2131298,pla_solexa_sample_N2131299,pla_solexa_sample_N2131304,	54865234,54865320,54866288,	2155.777,34.352,3033.421,	multi,AAGAAA,AATAAA,	12	153.642,4.839,258.290, 76.307,1.892,276.229, 350.593,0.000,215.804, 246.628,2.954,221.519, 279.902,5.801,204.486, 303.037,2.852,299.469, 81.296,1.742,178.274, 93.022,6.343,164.201, 8.428,0.000,5.418, 84.150,0.572,220.960, 172.070,3.524,417.545, 306.704,3.834,571.238,
uc002rah.2		chr2	+	10269513	9	pla_solexa_sample_N0218023,pla_solexa_sample_N0218025,pla_solexa_sample_N0218027,pla_solexa_sample_N0218028,pla_solexa_sample_N0218030,pla_solexa_sample_N0218034,pla_solexa_sample_N0218035,pla_solexa_sample_N0218045,pla_solexa_sample_N0218047,	10269532,10269654,10269923,10270091,10270445,10270591,10270736,10271350,10271539,	10.814,34.310,662.333,303.680,14.256,50.093,20.349,3933.897,7677.995,	AATGAA,none,multi,multi,none,none,AATACA,multi,multi,	12	0.605,2.420,42.949,18.752,0.605,3.025,1.210,97.992,150.618, 2.523,5.046,107.208,26.488,1.262,5.048,0.631,405.501,780.728, 0.000,1.266,10.760,3.165,0.000,0.000,0.633,53.162,94.928, 2.214,2.952,44.303,28.797,0.738,2.952,0.000,128.479,245.890, 0.000,0.000,10.152,8.700,0.000,0.725,0.000,58.733,104.420, 0.713,2.139,34.937,19.251,4.278,6.417,1.426,245.992,390.024, 1.162,4.646,74.329,51.680,2.323,13.938…
uc002rbv.3	B2R851	chr2	+	12880920	7	pla_solexa_sample_N0220088,pla_solexa_sample_N0220089,pla_solexa_sample_N0220090,pla_solexa_sample_N0220091,pla_solexa_sample_N0220097,pla_solexa_sample_N0220100,pla_solexa_sample_N0220103,	12881454,12881533,12881681,12882071,12882365,12882629,12882855,	36.158,72.676,19.800,12.330,18.278,21.662,601.770,	AGTAAA,AATAAA,AAGAAA,AATAAA,CATAAA,none,AATAAA,	12	0.000,3.025,0.000,0.000,0.605,1.815,1.815, 3.785,5.046,2.522,0.000,0.631,1.892,3.154, 2.532,6.330,0.633,0.000,3.798,1.899,3.797, 5.167,8.860,5.907,2.214,2.215,2.954,5.907, 3.625,7.250,2.900,1.450,0.000,0.725,2.900, 1.426,6.417,1.426,0.713,2.852,5.704,97.684, 5.808,3.485,0.581,0.581,0.581,0.581,105.105, 2.114,4.934,2.115,1.410,2.818,4.228,9.160, 0.602,2.408,0.000,0.602,1.806,0.000,77.643, 2.288,4.…
uc002rqz.2	NM_001031684	chr2	-	38972275	4	pla_solexa_sample_N0244391,pla_solexa_sample_N0244396,pla_solexa_sample_N0244398,pla_solexa_sample_N0244402,	38970750,38971269,38971500,38972038,	4176.295,31.700,13.387,5692.288,	AATAAA,ATTAAA,none,multi,	12	214.133,4.235,1.815,326.639, 621.177,5.045,1.893,411.807, 239.845,1.899,0.000,353.124, 301.270,2.953,0.000,579.654, 247.271,2.175,1.450,363.293, 410.704,2.852,0.713,424.964, 291.504,2.323,0.581,585.336, 391.825,0.705,2.819,372.094, 350.293,1.204,0.602,832.397, 494.594,4.578,2.289,585.608, 345.314,1.174,0.587,378.789, 268.366,2.556,0.639,478.585,
uc002rvk.2	A8K7W2	chr2	-	47132602	9	pla_solexa_sample_N0254441,pla_solexa_sample_N0254442,pla_solexa_sample_N0254445,pla_solexa_sample_N0254450,pla_solexa_sample_N0254453,pla_solexa_sample_N0254455,pla_solexa_sample_N0254459,pla_solexa_sample_N0254460,pla_solexa_sample_N0254461,	47129018,47129233,47129474,47130352,47131690,47131909,47132377,47132460,47132531,	2236.222,21.549,19.211,14.403,45.343,25.017,2106.597,657.680,185.120,	AATAAA,AATAGA,none,AAGAAA,multi,none,multi,AATGAA,none,	12	199.614,1.210,1.815,3.630,5.445,4.235,109.487,93.759,7.864, 234.596,0.631,1.893,0.631,3.154,5.045,84.509,29.011,6.937, 175.929,3.165,0.000,2.531,1.899,0.000,145.557,66.449,28.478, 155.064,3.691,3.691,0.738,1.476,2.215,111.495,64.240,14.767, 111.670,0.000,1.450,0.725,2.900,0.725,110.945,54.384,15.228, 164.710,2.852,0.000,1.426,7.130,0.713,116.934,86.989,27.807, 196.855,1.162,3.484,1.161,8.129,6.38…
uc002skj.2	MTDC_HUMAN	chr2	+	74441369	5	pla_solexa_sample_N0283430,pla_solexa_sample_N0283431,pla_solexa_sample_N0283432,pla_solexa_sample_N0283435,pla_solexa_sample_N0283438,	74441471,74441809,74441906,74442188,74442421,	12.969,155.170,40.660,1053.092,4020.622,	AATAGA,AAGAAA,none,none,multi,	12	0.000,15.124,5.444,57.464,170.581, 0.000,12.613,4.415,59.280,380.278, 0.000,6.963,2.531,56.956,152.519, 3.691,18.458,0.738,64.980,226.696, 0.000,6.525,2.901,29.731,93.541, 2.139,9.269,1.426,77.720,298.043, 2.322,16.840,5.226,183.498,509.264, 0.705,13.389,2.818,54.264,326.285, 1.204,30.095,6.621,276.264,618.734, 1.145,9.157,1.717,57.241,405.289, 1.761,5.872,2.349,48.154,430.465, 0.000,10.863,4.473…
uc002sox.3	FIGC	chr2	+	85280532	16	pla_solexa_sample_N0287652,pla_solexa_sample_N0287653,pla_solexa_sample_N0287655,pla_solexa_sample_N0287656,pla_solexa_sample_N0287658,pla_solexa_sample_N0287659,pla_solexa_sample_N0287660,pla_solexa_sample_N0287662,pla_solexa_sample_N0287665,pla_solexa_sample_N0287671,pla_solexa_sample_N0287673,pla_solexa_sample_N0287676,pla_solexa_sample_N0287677,pla_solexa_sample_N0287688,pla_solexa_sample_N02…	85280595,85280664,85280814,85280892,85281346,85281409,85281451,85281631,85282074,85282366,85282530,85282822,85282900,85284896,85284949,85286593,	41.385,122.524,41.637,7257.549,15.850,19.317,36.748,26.671,144.696,675.841,13.532,256.565,86.751,43.774,11.234,90.193,	AATGAA,AATATA,none,multi,none,none,none,AGTAAA,none,AATAAA,AATAAA,TATAAA,multi,AATAAA,none,AATAAA,	12	1.815,10.889,5.445,401.646,4.840,0.000,1.210,1.815,18.148,19.962,0.605,12.099,4.235,1.815,0.000,3.025, 1.893,8.831,6.307,528.473,0.631,1.262,3.154,2.523,22.704,80.091,3.784,46.037,8.831,6.938,1.892,11.352, 0.633,17.087,0.000,569.553,0.000,1.899,4.430,0.633,8.860,49.996,1.266,15.189,8.861,1.266,0.633,8.228, 3.691,16.243,2.952,573.008,0.738,2.214,2.953,2.215,7.384,28.797,0.000,14.029,4.428,0.738,0.…
uc002svs.2	A0MNN9	chr2	+	96937089	11	pla_solexa_sample_N0292886,pla_solexa_sample_N0292889,pla_solexa_sample_N0292890,pla_solexa_sample_N0292892,pla_solexa_sample_N0292897,pla_solexa_sample_N0292901,pla_solexa_sample_N0292903,pla_solexa_sample_N0292904,pla_solexa_sample_N0292906,pla_solexa_sample_N0292910,pla_solexa_sample_N0292912,	96937295,96937497,96937562,96937711,96938535,96938843,96939016,96939071,96939236,96939609,96939863,	1144.589,127.347,48.933,41.883,10.111,42.530,50.846,225.713,49.226,98.506,2241.648,	multi,multi,AATGAA,none,none,GATAAA,AATGAA,AATATA,ACTAAA,ACTAAA,AATAAA,	12	52.627,9.680,3.630,4.235,0.605,5.444,4.234,15.124,3.025,6.049,199.613, 68.743,5.678,2.523,4.415,0.631,1.262,2.524,18.290,4.415,11.353,182.885, 70.249,4.431,1.266,1.899,1.899,4.431,7.595,15.822,8.227,9.493,216.431, 66.454,6.643,4.429,3.691,1.476,3.691,8.121,28.059,5.168,14.029,194.201, 65.261,15.226,3.625,5.075,3.625,2.900,0.725,17.403,2.900,6.526,187.085, 91.266,11.408,0.713,4.991,0.713,4.278,7.1…
uc002tbc.2	BC156887	chr2	+	102507711	6	pla_solexa_sample_N0301150,pla_solexa_sample_N0301151,pla_solexa_sample_N0301154,pla_solexa_sample_N0301161,pla_solexa_sample_N0301173,pla_solexa_sample_N0301180,	102507956,102508026,102508287,102509260,102510697,102511150,	4561.773,10.796,70.854,2074.014,22.790,1871.174,	AATAAA,none,multi,multi,none,AATAAA,	12	262.522,0.000,5.445,182.073,1.815,108.880, 252.258,0.000,5.047,102.797,1.262,31.532, 304.396,3.165,6.330,184.790,1.266,225.923, 406.866,0.738,13.288,218.568,0.738,201.585, 311.808,1.450,6.525,172.582,4.350,236.394, 313.731,0.713,2.852,175.405,1.426,227.456, 532.494,1.743,5.809,196.853,3.484,114.977, 332.626,0.000,4.228,188.161,1.410,119.804, 726.467,1.204,6.621,184.779,0.602,296.728, 282.784,1.14…
uc002tlh.1	DDX18	chr2	+	118588300	8	pla_solexa_sample_N0309490,pla_solexa_sample_N0309494,pla_solexa_sample_N0309501,pla_solexa_sample_N0309504,pla_solexa_sample_N0309505,pla_solexa_sample_N0309508,pla_solexa_sample_N0309512,pla_solexa_sample_N0309513,	118588429,118588625,118588965,118589093,118589258,118589527,118589892,118589952,	907.196,763.022,735.337,137.651,60.431,91.146,11.760,6961.910,	multi,AATATA,AATAAA,none,AATACA,multi,none,ATTAAA,	12	65.935,67.748,60.490,19.358,14.518,12.099,1.210,311.514, 54.866,58.018,78.830,22.072,7.568,5.045,0.631,616.135, 61.387,62.651,44.299,5.697,2.532,10.126,0.633,534.115, 78.267,65.717,62.766,5.168,4.430,14.768,0.738,487.351, 59.459,42.058,22.479,7.976,7.250,12.326,0.000,459.737, 63.459,72.728,50.624,7.843,0.713,4.278,0.713,450.632, 67.941,48.197,65.038,8.129,2.904,3.484,1.162,832.712, 87.385,42.283,…
uc002tlj.2	A8K3V7	chr2	-	118677919	5	pla_solexa_sample_N0309574,pla_solexa_sample_N0309575,pla_solexa_sample_N0309584,pla_solexa_sample_N0309587,pla_solexa_sample_N0309590,	118673062,118673150,118676908,118677171,118677574,	573.652,1105.957,15.858,29.575,260.936,	GATAAA,multi,multi,AATAAA,AATAAA,	12	31.455,114.931,1.815,0.605,13.913, 59.280,85.136,0.000,1.892,9.460, 68.347,120.241,2.532,1.899,14.557, 69.411,116.669,0.738,1.476,16.981, 65.986,122.549,2.900,2.175,18.127, 35.651,112.657,1.426,5.704,24.242, 42.392,69.101,1.161,2.324,40.068, 35.235,74.700,2.818,1.410,11.276, 16.854,46.346,0.602,5.418,53.568, 49.804,76.706,0.000,1.717,13.167, 55.790,78.108,0.587,1.762,19.380, 43.450,88.817,1.278,3…
uc002tvc.2		chr2	+	138771700	4	pla_solexa_sample_N0321604,pla_solexa_sample_N0321605,pla_solexa_sample_N0321613,pla_solexa_sample_N0321614,	138771999,138772225,138773836,138773920,	79.256,773.289,74.208,1296.567,	AATAAA,ATTAAA,multi,multi,	12	7.864,75.612,7.865,65.331, 10.093,60.542,3.154,75.047, 10.126,92.395,10.127,210.104, 4.430,69.408,2.952,73.840, 6.526,47.858,11.603,154.453, 7.843,69.876,2.852,107.666, 2.323,42.394,6.969,86.524, 9.161,73.996,4.934,102.185, 0.000,1.806,0.000,3.612, 10.873,77.853,1.716,95.023, 2.348,81.044,18.205,202.018, 7.668,80.509,3.834,120.766,
uc002txb.2		chr2	-	150426488	5	pla_solexa_sample_N0330727,pla_solexa_sample_N0330728,pla_solexa_sample_N0330729,pla_solexa_sample_N0330730,pla_solexa_sample_N0330731,	150426064,150426155,150426210,150426253,150426401,	14.561,3542.807,11.124,19.936,2907.071,	none,AATAAA,none,AATACA,multi,	12	0.000,109.486,1.210,0.000,151.224, 0.631,388.475,0.631,3.785,234.601, 1.266,287.310,1.266,1.899,258.835, 1.476,261.397,0.738,2.214,214.137, 1.450,200.136,2.175,2.175,187.083, 1.426,270.236,0.713,2.139,251.697, 1.162,297.313,0.581,1.162,304.865, 0.000,242.427,0.705,0.000,184.636, 2.408,370.758,0.602,1.806,418.911, 2.289,398.421,0.000,1.716,250.154, 1.174,298.333,0.587,1.761,176.180, 1.278,418.524,…
uc002vfy.2	A8K3X5	chr2	+	217069925	4	pla_solexa_sample_N0396052,pla_solexa_sample_N0396055,pla_solexa_sample_N0396059,pla_solexa_sample_N0396062,	217070145,217070222,217070846,217071002,	13976.899,598.487,121.845,35184.216,	multi,none,multi,multi,	12	654.485,38.110,6.050,1009.556, 1835.151,60.543,20.813,8192.600, 858.129,31.011,11.392,2159.237, 985.783,54.641,8.120,1625.249, 614.916,30.455,5.075,2766.397, 891.996,47.058,10.695,2853.537, 1340.235,53.425,9.871,2355.279, 1260.743,50.036,7.755,2813.244, 2095.732,73.432,8.428,1802.018, 1034.407,57.240,17.168,4116.462, 1165.727,54.615,8.810,2830.627, 1239.591,47.924,7.668,2660.007,
uc002vjw.3	C2orf17	chr2	+	220047351	6	pla_solexa_sample_N0398744,pla_solexa_sample_N0398745,pla_solexa_sample_N0398746,pla_solexa_sample_N0398750,pla_solexa_sample_N0398752,pla_solexa_sample_N0398757,	220048210,220048444,220048678,220049226,220049390,220050189,	2509.106,3770.724,14.864,25.093,22.742,1808.765,	AATAAA,multi,multi,none,AATAGA,multi,	12	192.958,261.314,0.000,3.025,3.025,114.929, 245.320,308.387,1.261,1.261,0.631,166.489, 275.285,434.132,0.633,1.266,4.431,144.921, 177.956,307.178,0.738,1.477,2.952,62.765, 234.944,306.004,0.725,3.625,3.625,242.195, 250.272,318.008,1.426,2.852,0.713,122.640, 167.821,243.312,0.000,1.742,0.581,112.074, 178.999,269.202,2.820,2.114,0.705,221.989, 212.464,166.724,0.602,0.000,0.602,55.975, 195.774,371.51…
uc002vye.2	MIPT3	chr2	+	239307560	4	pla_solexa_sample_N0415442,pla_solexa_sample_N0415444,pla_solexa_sample_N0415446,pla_solexa_sample_N0415456,	239307596,239307792,239308230,239309537,	20.046,1236.390,24.266,2478.407,	none,multi,CATAAA,multi,	12	0.000,32.665,0.000,212.923, 3.153,57.392,0.000,216.312, 2.532,143.659,2.532,310.098, 1.476,111.498,6.645,252.530, 3.625,130.523,3.625,230.589, 0.713,67.735,2.852,175.404, 0.581,165.498,0.581,218.345, 4.932,96.548,2.115,245.949, 1.806,187.189,2.408,193.809, 0.000,58.957,0.572,116.771, 0.587,108.056,2.935,178.526, 0.639,76.677,0.000,127.155,
uc002vyg.2	A6NL50	chr2	+	239355152	4	pla_solexa_sample_N0415507,pla_solexa_sample_N0415510,pla_solexa_sample_N0415513,pla_solexa_sample_N0415527,	239355370,239355558,239356439,239360889,	1867.705,1970.460,19.608,1079.636,	ACTAAA,multi,none,multi,	12	86.499,116.744,0.000,91.946, 105.317,203.697,1.262,80.723, 124.670,104.420,2.532,107.583, 106.331,107.805,2.952,83.437, 110.221,72.514,0.725,130.524, 111.232,121.925,0.000,83.424, 282.796,282.796,1.743,72.588, 115.574,125.438,0.705,130.375, 407.473,410.480,5.417,55.976, 116.776,143.110,1.716,72.700, 110.407,104.535,0.000,111.581, 190.411,176.996,2.556,58.785,
uc002wbc.2	B4DGE8	chr2	+	242291382	9	pla_solexa_sample_N0417656,pla_solexa_sample_N0417659,pla_solexa_sample_N0417662,pla_solexa_sample_N0417666,pla_solexa_sample_N0417673,pla_solexa_sample_N0417679,pla_solexa_sample_N0417681,pla_solexa_sample_N0417682,pla_solexa_sample_N0417683,	242291527,242291692,242291966,242292249,242292786,242293128,242293281,242293360,242293438,	97.723,56.920,2624.969,24.535,15.367,109.839,19.469,12.672,3587.164,	none,none,multi,ATTAAA,none,none,AATAGA,AATAGA,multi,	12	4.235,3.630,88.919,1.210,1.815,18.752,6.049,1.210,232.881, 6.309,0.631,234.601,2.523,2.524,9.460,2.523,1.262,330.456, 9.495,3.165,113.279,3.165,0.633,6.962,0.633,0.633,348.061, 6.643,5.167,143.992,0.000,3.690,12.552,3.692,1.476,341.148, 2.175,4.350,122.548,3.626,0.000,8.701,0.725,0.725,196.512, 7.130,3.565,241.003,2.139,0.713,8.556,1.426,0.713,284.496, 9.293,6.390,240.986,2.324,1.161,6.969,1.162,…
uc002wnw.2	A0AV43	chr20	-	10620146	5	pla_solexa_sample_N2145419,pla_solexa_sample_N2145421,pla_solexa_sample_N2145436,pla_solexa_sample_N2145439,pla_solexa_sample_N2145441,	10618333,10618631,10619480,10619533,10619607,	2059.565,4496.915,12.339,12.772,44.240,	AATAAA,multi,none,AAGAAA,AATGAA,	12	99.806,148.802,0.000,1.815,2.420, 555.592,809.110,3.784,3.153,15.136, 120.240,284.145,0.000,0.000,5.063, 94.515,248.107,0.000,1.476,1.476, 109.495,324.135,0.000,1.450,6.526, 180.396,410.703,1.426,0.713,0.713, 121.365,502.299,1.162,1.743,0.581, 129.670,164.905,0.000,0.705,2.819, 149.868,627.760,3.010,0.000,1.204, 223.825,372.662,1.144,1.717,2.862, 115.691,219.639,1.175,0.000,3.524, 159.103,384.659…
uc002xtv.1	AL136579	chr20	-	47242423	2	pla_solexa_sample_N2172093,pla_solexa_sample_N2172097,	47240793,47241573,	2265.007,1002.402,	ATTAAA,multi,	12	203.242,166.950, 160.814,47.930, 170.234,90.499, 196.418,154.328, 243.646,52.210, 149.022,69.876, 134.722,49.939, 195.207,85.978, 23.474,11.437, 139.103,75.557, 501.525,98.662, 147.602,99.040,
uc002ydy.2	C20orf11	chr20	+	61576264	6	pla_solexa_sample_N2182500,pla_solexa_sample_N2182502,pla_solexa_sample_N2182505,pla_solexa_sample_N2182512,pla_solexa_sample_N2182519,pla_solexa_sample_N2182520,	61576606,61576759,61576981,61578892,61579670,61579823,	21.270,268.985,6293.976,26.962,12.819,4272.610,	AATACA,TATAAA,multi,AATAAA,none,AGTAAA,	12	2.420,15.124,452.456,1.815,1.210,261.311, 1.262,23.336,859.562,3.784,1.262,478.654, 1.899,18.353,314.524,0.000,2.532,411.977, 0.738,22.889,368.463,1.476,0.000,320.471, 1.450,13.776,273.375,2.175,1.450,295.856, 0.713,18.538,407.137,2.852,0.713,342.966, 1.161,26.715,569.657,1.742,0.581,368.739, 2.819,16.915,787.174,0.705,2.114,260.043, 1.204,22.270,588.639,2.408,0.602,398.443, 5.150,32.629,519.206,…
uc002ypa.2	A6NHJ0	chr21	+	33040891	4	pla_solexa_sample_N2193426,pla_solexa_sample_N2193428,pla_solexa_sample_N2193431,pla_solexa_sample_N2193432,	33040906,33040985,33041098,33041236,	156.491,31071.873,359.475,9250.640,	AATAAA,multi,TATAAA,multi,	12	16.333,1636.823,7.864,241.959, 19.551,3858.865,41.624,875.329, 13.290,2257.962,28.478,842.308, 11.814,2223.366,19.197,570.054, 5.801,1859.976,20.302,477.861, 9.982,2114.126,24.955,548.318, 10.453,2464.448,42.392,1230.483, 20.438,3722.337,32.417,468.640, 21.067,4190.865,48.153,1398.162, 6.868,2252.574,36.634,1081.346, 9.395,1815.829,22.316,697.671, 11.502,2674.703,35.144,818.516,
uc002zdv.2	AGPAT3	chr21	+	45402273	14	pla_solexa_sample_N2206692,pla_solexa_sample_N2206694,pla_solexa_sample_N2206695,pla_solexa_sample_N2206697,pla_solexa_sample_N2206699,pla_solexa_sample_N2206702,pla_solexa_sample_N2206705,pla_solexa_sample_N2206710,pla_solexa_sample_N2206711,pla_solexa_sample_N2206713,pla_solexa_sample_N2206714,pla_solexa_sample_N2206722,pla_solexa_sample_N2206729,pla_solexa_sample_N2206731,	45402348,45402433,45402598,45403014,45403234,45403783,45404249,45404551,45404662,45405244,45405308,45406414,45407012,45407468,	12.376,102.429,14.825,114.698,58.204,69.321,45.739,4829.603,93.162,47.628,26.964,3001.865,715.037,20.713,	none,AGTAAA,none,none,none,AATAGA,none,AATAAA,ATTAAA,ACTAAA,none,multi,multi,ATTAAA,	12	0.000,5.445,0.000,7.260,1.815,10.284,1.815,282.484,2.420,6.654,3.025,103.438,50.208,1.815, 1.892,8.830,1.262,9.463,14.505,8.831,8.199,408.655,10.090,3.154,5.676,501.990,88.922,0.631, 1.899,10.127,2.532,5.697,3.165,8.228,1.899,429.697,6.961,3.165,1.899,193.650,47.467,2.532, 0.000,5.907,1.476,7.381,0.738,3.692,5.908,344.839,5.169,4.430,1.477,183.861,53.165,2.214, 0.000,5.075,0.000,10.150,2.900,3.62…
uc002zqg.2	BX640785	chr22	-	19838690	7	pla_solexa_sample_N2212104,pla_solexa_sample_N2212106,pla_solexa_sample_N2212114,pla_solexa_sample_N2212116,pla_solexa_sample_N2212117,pla_solexa_sample_N2212120,pla_solexa_sample_N2212121,	19833672,19835372,19836872,19837190,19837281,19837759,19838319,	1722.742,98.666,29.536,40.068,61.827,803.324,13.486,	AATAAA,ATTAAA,TATAAA,ATTAAA,multi,ATTAAA,CATAAA,	12	82.870,1.815,2.420,1.815,3.025,30.850,0.000, 290.724,15.769,5.045,3.154,4.415,89.554,2.523, 136.696,9.495,3.798,5.064,5.063,41.137,1.266, 124.788,4.430,2.953,3.691,4.429,30.274,0.738, 126.897,2.175,1.450,3.625,5.075,58.735,2.175, 126.205,9.269,1.426,2.852,2.852,77.719,0.713, 103.944,9.292,1.162,2.903,5.227,106.269,0.000, 130.374,5.637,3.524,2.114,9.162,44.399,0.705, 59.588,15.650,2.408,5.418,8.42…
uc003anb.2	B2RBY9	chr22	+	33255364	7	pla_solexa_sample_N2224245,pla_solexa_sample_N2224246,pla_solexa_sample_N2224247,pla_solexa_sample_N2224248,pla_solexa_sample_N2224252,pla_solexa_sample_N2224257,pla_solexa_sample_N2224261,	33255677,33256553,33256858,33256975,33257905,33258640,33259027,	23.339,1462.660,16.476,79.261,18.552,32.627,3472.295,	AATATA,multi,ATTAAA,AATAAA,AATGAA,TATAAA,AGTAAA,	12	3.630,106.460,0.000,8.470,4.235,4.840,513.548, 1.261,52.344,1.262,3.154,0.631,1.262,128.018, 4.430,147.454,1.899,9.495,1.899,6.962,572.084, 1.477,47.253,0.738,4.429,0.738,3.692,160.974, 0.725,73.237,0.725,3.625,2.900,2.900,243.647, 1.426,180.394,1.426,5.704,0.000,2.139,423.537, 2.323,247.954,2.324,9.292,0.581,4.064,310.089, 2.114,74.702,2.115,7.047,2.819,1.409,398.166, 2.408,326.219,4.816,13.244,…
uc003aze.2	AAG2	chr22	-	41222542	13	pla_solexa_sample_N2232105,pla_solexa_sample_N2232106,pla_solexa_sample_N2232107,pla_solexa_sample_N2232108,pla_solexa_sample_N2232109,pla_solexa_sample_N2232111,pla_solexa_sample_N2232112,pla_solexa_sample_N2232115,pla_solexa_sample_N2232117,pla_solexa_sample_N2232118,pla_solexa_sample_N2232123,pla_solexa_sample_N2232126,pla_solexa_sample_N2232130,	41220449,41220542,41220604,41220689,41220784,41220844,41220948,41221143,41221253,41221333,41221737,41222143,41222510,	44.919,111.114,826.244,11.969,47.457,29.242,10.667,348.260,29.478,116.200,69.404,7418.041,182.507,	AATATA,AATATA,AGTAAA,none,TATAAA,CATAAA,AGTAAA,GATAAA,TATAAA,ATTAAA,none,multi,AATAAA,	12	2.420,3.025,57.465,0.000,3.630,1.815,0.000,12.703,1.815,5.445,6.049,569.805,22.382, 3.784,6.937,95.227,0.631,5.678,3.785,1.262,53.604,3.784,11.353,8.829,366.405,14.507, 6.330,11.391,64.550,0.000,1.266,2.532,0.633,35.439,1.266,12.025,7.595,844.843,15.822, 2.953,7.383,59.811,0.738,4.428,1.476,0.738,22.890,0.738,8.122,3.691,732.502,10.336, 2.900,8.701,44.233,0.725,0.725,2.900,2.175,17.402,1.450,7.25…
uc003bgm.1	A6NLC4	chr22	+	46239551	3	pla_solexa_sample_N2237718,pla_solexa_sample_N2237724,pla_solexa_sample_N2237726,	46239866,46240523,46240748,	7156.541,27.503,1342.869,	multi,ATTAAA,multi,	12	361.120,1.815,53.838, 779.468,1.262,222.617, 510.701,2.532,67.718, 415.723,3.691,53.159, 460.463,2.900,87.740, 657.411,2.139,89.839, 706.121,2.323,99.296, 472.163,1.409,140.942, 1139.353,3.010,80.656, 626.254,3.434,188.903, 381.135,2.349,166.781, 646.634,0.639,91.374,
uc003btt.3	JAGN1	chr3	+	9935061	2	pla_solexa_sample_N0426844,pla_solexa_sample_N0426849,	9935531,9936028,	7498.834,300.254,	multi,ATTAAA,	12	529.275,6.654, 544.872,6.937, 751.815,25.314, 657.183,11.813, 606.938,13.053, 621.760,11.408, 717.734,72.588, 455.251,12.684, 639.796,99.310, 717.844,18.318, 767.555,9.396, 488.807,12.780,
uc003dgl.2	B0KZ81	chr3	+	53226282	3	pla_solexa_sample_N0470345,pla_solexa_sample_N0470346,pla_solexa_sample_N0470347,	53226552,53226633,53226730,	870.607,157.595,610.542,	AATATA,none,multi,	12	84.685,22.381,61.093, 62.437,13.874,90.183, 60.758,21.516,39.868, 76.052,34.706,67.933, 65.985,5.801,27.556, 90.551,7.130,22.104, 72.004,5.226,24.389, 59.900,11.276,62.016, 69.821,0.602,3.612, 64.113,17.174,68.692, 93.375,7.048,109.232, 70.927,10.863,33.865,
uc003dqs.2	CGBP1_HUMAN	chr3	-	88104623	14	pla_solexa_sample_N0490542,pla_solexa_sample_N0490543,pla_solexa_sample_N0490544,pla_solexa_sample_N0490545,pla_solexa_sample_N0490552,pla_solexa_sample_N0490553,pla_solexa_sample_N0490555,pla_solexa_sample_N0490556,pla_solexa_sample_N0490557,pla_solexa_sample_N0490569,pla_solexa_sample_N0490570,pla_solexa_sample_N0490571,pla_solexa_sample_N0490572,pla_solexa_sample_N0490583,	88101106,88101167,88101215,88101281,88101792,88101852,88101944,88102025,88102118,88103050,88103223,88103342,88103415,88104566,	266.422,3057.879,17.268,1726.553,59.690,20.505,25.475,484.856,32.085,79.543,31.481,37.191,11.334,3757.450,	AATATA,AATAAA,TATAAA,ATTAAA,ATTAAA,none,none,AGTAAA,TATAAA,multi,TATAAA,AATAAA,none,multi,	12	12.098,210.503,0.605,141.544,4.234,5.445,1.815,28.431,0.605,4.235,2.420,6.049,0.605,321.800, 28.379,293.247,1.261,143.785,5.679,1.262,0.000,44.145,3.784,7.569,1.892,1.892,1.262,268.025, 25.947,296.801,0.633,178.462,5.064,1.266,2.532,49.995,1.266,3.165,1.899,4.431,0.000,272.123, 41.350,361.085,2.214,217.830,4.430,1.476,8.122,50.210,1.476,11.812,8.121,1.476,1.476,341.144, 18.852,220.439,3.625,135.6…
uc003dzq.2		chr3	-	112724383	6	pla_solexa_sample_N0506784,pla_solexa_sample_N0506787,pla_solexa_sample_N0506799,pla_solexa_sample_N0506803,pla_solexa_sample_N0506804,pla_solexa_sample_N0506807,	112721296,112722294,112723401,112723642,112723701,112723769,	1458.100,33.124,13.343,11.616,276.982,2977.642,	ATTAAA,multi,AAGAAA,multi,AATAAA,ATTAAA,	12	45.368,1.210,3.025,0.605,13.913,242.560, 177.208,5.046,0.631,1.261,32.794,244.688, 103.154,2.532,0.000,0.000,17.089,258.832, 153.590,0.738,3.691,2.215,22.890,232.600, 84.841,5.801,1.450,0.000,26.828,283.526, 91.267,2.139,0.000,0.000,21.390,221.039, 121.943,0.581,0.581,1.743,23.229,252.020, 86.680,4.229,1.410,2.114,21.142,232.558, 115.562,4.816,0.000,0.602,12.640,228.112, 230.696,1.717,0.000,0.572…
uc003epx.1	NM_021203	chr3	+	133538610	6	pla_solexa_sample_N0532422,pla_solexa_sample_N0532423,pla_solexa_sample_N0532424,pla_solexa_sample_N0532427,pla_solexa_sample_N0532430,pla_solexa_sample_N0532431,	133538752,133538831,133538942,133539076,133539466,133539522,	298.132,99.128,10.134,39.715,924.594,2277.808,	none,none,none,AATACA,AATACA,multi,	12	16.333,3.630,0.000,1.210,48.394,162.717, 17.028,6.308,1.892,1.262,58.652,83.246, 18.353,3.165,0.633,2.532,51.895,198.082, 19.198,6.645,0.000,4.430,75.316,107.067, 21.753,9.427,1.450,2.175,77.589,106.593, 29.234,11.408,0.000,4.991,91.979,122.638, 23.228,4.065,0.581,4.646,92.331,363.514, 34.532,13.390,1.410,2.820,88.089,193.798, 21.067,12.039,3.010,3.612,149.868,542.295, 35.492,13.165,0.572,4.579,7…
uc003fcl.1	J3KQL7	chr3	+	158546771	4	pla_solexa_sample_N0556519,pla_solexa_sample_N0556521,pla_solexa_sample_N0556522,pla_solexa_sample_N0556526,	158546917,158547053,158547204,158547503,	3117.365,147.226,17.086,7927.071,	AATATA,AATGAA,multi,multi,	12	99.809,9.679,1.815,431.285, 184.778,12.614,1.262,721.451, 179.095,7.595,3.165,753.709, 101.159,19.936,1.477,558.977, 242.920,25.379,0.725,488.016, 293.053,7.843,1.426,534.769, 206.145,11.034,0.581,574.885, 106.415,19.732,0.000,553.912, 82.460,7.224,0.602,289.505, 739.597,10.302,1.716,1070.472, 506.223,8.222,1.762,776.956, 375.712,7.668,2.556,1173.139,
uc003fhy.2	B2RB36	chr3	+	172115265	9	pla_solexa_sample_N0566415,pla_solexa_sample_N0566420,pla_solexa_sample_N0566424,pla_solexa_sample_N0566425,pla_solexa_sample_N0566439,pla_solexa_sample_N0566440,pla_solexa_sample_N0566443,pla_solexa_sample_N0566444,pla_solexa_sample_N0566445,	172115429,172116144,172116351,172116561,172117920,172118063,172118301,172118378,172118485,	16.141,10.461,200.960,2777.655,128.704,191.736,130.202,16.918,2992.786,	none,none,GATAAA,AATAAA,AATAAA,AAGAAA,GATAAA,ATTAAA,multi,	12	1.210,0.000,12.099,157.272,1.210,10.889,7.865,0.000,46.577, 2.523,0.631,17.029,186.038,7.568,12.614,11.983,1.262,232.076, 1.266,0.633,13.924,143.657,8.861,8.228,6.329,1.899,209.471, 0.000,0.738,18.458,200.111,3.692,21.413,8.859,0.738,139.559, 0.725,0.725,11.600,130.526,7.975,24.653,13.776,1.450,165.332, 2.139,2.139,11.408,333.694,9.269,27.808,8.556,0.000,261.680, 4.646,0.000,16.841,179.434,12.776…
uc003fms.2	D3DNT0	chr3	+	183888543	5	pla_solexa_sample_N0575662,pla_solexa_sample_N0575663,pla_solexa_sample_N0575666,pla_solexa_sample_N0575680,pla_solexa_sample_N0575683,	183888663,183888731,183889027,183891265,183891397,	746.598,445.294,15.937,240.295,5759.904,	AATAAA,none,none,none,AATAAA,	12	57.466,34.479,0.000,12.098,220.180, 38.469,47.297,5.677,29.009,793.971, 50.629,26.581,1.899,14.555,368.946, 53.164,27.320,2.215,19.938,375.852, 87.016,23.929,2.175,17.404,333.561, 88.414,24.955,0.000,25.669,553.307, 63.296,59.810,0.581,18.583,561.527, 60.608,21.142,2.819,21.847,279.068, 130.006,92.690,0.000,30.094,869.108, 41.215,29.765,0.572,26.904,614.235, 25.840,31.125,0.000,8.221,387.595, 50.…
uc003fsv.2	C3orf6	chr3	+	191109549	22	pla_solexa_sample_N0583541,pla_solexa_sample_N0583542,pla_solexa_sample_N0583544,pla_solexa_sample_N0583547,pla_solexa_sample_N0583549,pla_solexa_sample_N0583552,pla_solexa_sample_N0583553,pla_solexa_sample_N0583557,pla_solexa_sample_N0583562,pla_solexa_sample_N0583565,pla_solexa_sample_N0583567,pla_solexa_sample_N0583568,pla_solexa_sample_N0583569,pla_solexa_sample_N0583573,pla_solexa_sample_N05…	191109740,191109948,191110042,191110475,191111181,191111425,191111469,191111743,191112010,191112261,191112370,191112485,191112564,191112769,191113373,191113541,191113627,191113908,191114193,191114932,191116214,191116447,	12.411,3763.673,913.700,40.598,63.602,54.680,24.365,305.734,21.909,53.922,51.443,14.445,533.901,75.753,499.802,47.930,16.472,116.275,36.305,16.112,559.509,484.409,	AAGAAA,multi,multi,ATTAAA,TATAAA,none,GATAAA,CATAAA,none,TATAAA,none,AATATA,multi,AATAAA,AATAAA,none,TATAAA,multi,AATAAA,AATAGA,AATAAA,AATAAA,	12	0.605,243.772,70.773,3.025,16.938,7.865,3.025,15.124,0.000,0.605,0.000,1.210,35.690,9.678,47.787,3.025,0.000,10.285,2.420,2.420,32.060,27.827, 0.000,147.571,48.559,2.524,4.415,3.154,2.523,19.552,0.000,7.568,3.785,2.523,55.497,3.153,31.533,1.892,0.000,1.261,1.262,0.631,17.658,6.938, 3.165,380.967,102.521,2.532,2.532,3.798,1.899,22.783,3.165,3.165,3.164,1.266,43.034,6.961,67.082,3.797,3.165,13.923,…
uc003geu.1	A2A335	chr4	-	2252271	3	pla_solexa_sample_N0593767,pla_solexa_sample_N0593771,pla_solexa_sample_N0593772,	2249161,2251310,2251957,	796.129,41.263,1450.334,	TATAAA,none,ATTAAA,	12	61.094,4.839,67.748, 65.587,1.892,232.703, 87.965,4.430,67.081, 43.565,4.430,67.195, 91.366,7.976,68.889, 81.284,4.991,52.051, 38.907,1.742,179.432, 105.708,3.524,97.253, 25.279,1.806,62.595, 59.535,0.572,230.121, 82.806,0.587,253.699, 53.035,4.473,71.565,
uc003guu.3	A6NJC1	chr4	+	39780054	14	pla_solexa_sample_N0617860,pla_solexa_sample_N0617864,pla_solexa_sample_N0617867,pla_solexa_sample_N0617871,pla_solexa_sample_N0617872,pla_solexa_sample_N0617874,pla_solexa_sample_N0617875,pla_solexa_sample_N0617876,pla_solexa_sample_N0617881,pla_solexa_sample_N0617883,pla_solexa_sample_N0617888,pla_solexa_sample_N0617890,pla_solexa_sample_N0617894,pla_solexa_sample_N0617897,	39780247,39780591,39780869,39781219,39781262,39781458,39781610,39781708,39782287,39782548,39783219,39783340,39783995,39784407,	2212.787,22.728,36.826,14.995,526.223,182.567,110.046,28.849,57.707,10.555,20.078,178.210,24.115,4042.444,	multi,none,multi,TATAAA,ATTAAA,multi,multi,multi,multi,none,none,none,multi,multi,	12	84.685,3.630,3.630,6.049,20.568,13.308,7.865,2.420,1.815,0.000,1.815,4.840,1.210,184.492, 124.867,1.892,4.414,0.000,58.649,11.353,7.570,3.154,9.463,1.261,0.000,8.830,1.262,304.600, 182.892,1.266,1.899,0.633,46.831,14.558,8.227,1.899,2.532,1.899,1.899,16.455,2.532,217.699, 218.566,0.738,3.692,0.738,38.396,10.337,9.598,0.000,4.429,2.215,4.430,14.767,1.476,149.157, 128.349,0.000,1.450,1.450,24.656,8…
uc003hoe.2	BM-004	chr4	-	84012124	2	pla_solexa_sample_N0646432,pla_solexa_sample_N0646434,	84011846,84011961,	645.267,1286.988,	TATAAA,TATAAA,	12	55.046,77.427, 5.678,100.905, 127.836,141.126, 84.914,133.651, 61.634,65.262, 79.858,71.301, 31.941,77.815, 45.104,143.059, 16.855,18.660, 33.197,140.821, 25.254,137.420, 77.956,179.551,
uc003hwt.3	CDGSH2	chr4	+	103808587	4	pla_solexa_sample_N0666820,pla_solexa_sample_N0666821,pla_solexa_sample_N0666823,pla_solexa_sample_N0666825,	103809194,103809373,103809480,103809724,	27.297,737.109,12.131,1962.723,	multi,multi,none,AATAAA,	12	3.025,56.256,1.210,127.026, 2.523,1.893,1.892,106.579, 0.633,78.474,1.899,196.813, 3.691,38.396,0.000,143.249, 1.450,104.420,0.725,176.208, 4.278,58.468,1.426,173.264, 1.162,90.588,1.742,197.433, 1.410,15.504,1.410,86.680, 0.602,149.869,0.602,332.236, 2.289,69.836,0.000,164.290, 1.762,73.408,0.587,99.835, 4.473,0.000,0.639,159.103,
uc003hzb.1	A8MYS2	chr4	+	109588421	4	pla_solexa_sample_N0671896,pla_solexa_sample_N0671898,pla_solexa_sample_N0671900,pla_solexa_sample_N0671903,	109588531,109588618,109588742,109588973,	83.030,117.407,3047.297,8113.866,	multi,ATTAAA,multi,AATAAA,	12	12.099,4.235,177.842,247.401, 6.308,5.678,160.183,626.853, 6.330,10.759,267.059,620.815, 8.121,10.336,288.716,617.314, 6.526,8.701,245.821,565.605, 11.408,8.556,272.375,734.418, 3.485,8.131,237.506,762.447, 2.819,6.343,147.285,356.587, 6.622,7.826,287.097,1053.286, 5.722,17.745,388.116,1179.238, 5.285,10.570,229.621,539.696, 8.307,18.530,345.682,810.208,
uc003icv.3	C4orf3	chr4	-	120219934	6	pla_solexa_sample_N0678898,pla_solexa_sample_N0678900,pla_solexa_sample_N0678913,pla_solexa_sample_N0678914,pla_solexa_sample_N0678917,pla_solexa_sample_N0678920,	120218210,120218621,120219367,120219409,120219647,120219838,	1840.153,31.872,16.261,15.383,7892.708,14.254,	AATAAA,none,none,none,multi,AATAAA,	12	172.998,6.049,2.420,0.000,538.958,1.210, 104.686,1.893,1.261,0.631,776.319,0.631, 283.513,3.797,0.633,1.899,617.652,0.000, 219.308,1.476,0.738,5.168,807.820,0.000, 201.587,11.602,2.175,4.350,451.033,0.725, 136.188,0.000,1.426,0.000,521.934,1.426, 101.038,0.000,2.324,0.581,562.110,0.000, 201.551,2.819,3.523,2.114,747.710,1.410, 60.188,0.000,0.602,0.000,588.637,0.000, 66.975,1.145,0.572,0.000,686.9…
uc003igg.2	DG6	chr4	-	129192471	6	pla_solexa_sample_N0684297,pla_solexa_sample_N0684298,pla_solexa_sample_N0684302,pla_solexa_sample_N0684305,pla_solexa_sample_N0684307,pla_solexa_sample_N0684308,	129191300,129191474,129191941,129192066,129192242,129192294,	3078.850,18.024,682.893,582.317,12.669,70.932,	AATAAA,none,multi,multi,none,GATAAA,	12	309.704,0.605,43.554,33.271,4.839,1.815, 360.725,1.262,58.649,34.056,0.631,8.201, 249.339,1.899,34.807,37.340,0.000,6.330, 198.633,0.000,36.919,67.195,0.738,6.646, 192.885,1.450,64.537,31.180,0.725,4.350, 244.568,1.426,89.840,55.615,1.426,11.408, 247.956,3.485,49.941,37.747,0.581,6.390, 315.715,1.410,46.513,22.550,1.410,3.524, 226.907,0.602,51.160,37.318,0.602,1.806, 259.888,3.432,78.996,89.870,1…
uc003iur.3	NM_021928	chr4	+	177249481	18	pla_solexa_sample_N0713911,pla_solexa_sample_N0713912,pla_solexa_sample_N0713913,pla_solexa_sample_N0713916,pla_solexa_sample_N0713918,pla_solexa_sample_N0713920,pla_solexa_sample_N0713925,pla_solexa_sample_N0713927,pla_solexa_sample_N0713928,pla_solexa_sample_N0713931,pla_solexa_sample_N0713932,pla_solexa_sample_N0713933,pla_solexa_sample_N0713935,pla_solexa_sample_N0713937,pla_solexa_sample_N07…	177249679,177249745,177249817,177249950,177250147,177250247,177250544,177250754,177250826,177251055,177251200,177251277,177251648,177251721,177252704,177253080,177253177,177253393,	10.538,277.918,31.548,23.637,355.759,51.365,36.895,26.551,25.080,27.977,12.708,194.510,19.391,36.975,308.829,13.555,12.148,5443.509,	none,CATAAA,TATAAA,TATAAA,none,none,ATTAAA,multi,AATACA,AATACA,ATTAAA,multi,AGTAAA,none,CATAAA,multi,AGTAAA,multi,	12	0.605,13.914,0.605,6.049,27.825,10.284,1.815,0.605,0.605,0.605,3.025,19.962,1.815,0.605,13.914,1.210,0.605,534.115, 0.631,15.768,0.631,1.893,19.550,1.261,0.631,1.262,1.261,1.892,0.000,18.289,0.000,3.154,18.290,1.893,0.000,408.024, 1.899,17.089,0.000,1.899,29.745,3.165,1.899,2.532,0.000,1.266,0.633,13.290,0.000,4.430,16.455,0.633,0.633,467.667, 0.738,33.225,2.214,2.214,31.014,10.336,5.906,2.214,2.…
uc003iuu.1	AGA	chr4	-	178352862	3	pla_solexa_sample_N0714404,pla_solexa_sample_N0714409,pla_solexa_sample_N0714414,	178351932,178352290,178352719,	2341.683,97.059,1330.875,	AATAAA,AATACA,AATAAA,	12	94.969,10.284,75.008, 499.464,14.505,171.535, 163.907,11.391,144.922, 124.051,5.169,84.177, 160.980,5.075,124.721, 178.968,7.130,81.997, 149.235,8.130,92.911, 136.010,8.456,97.250, 138.432,6.622,66.809, 319.423,9.158,134.520, 139.183,4.110,99.834, 237.055,7.029,157.188,
uc003jee.3	MTRR	chr5	+	7900171	3	pla_solexa_sample_N0724401,pla_solexa_sample_N0724403,pla_solexa_sample_N0724413,	7900557,7900728,7901232,	72.864,317.330,4919.495,	none,multi,AATAAA,	12	13.914,5.445,251.633, 3.785,3.785,290.723, 3.165,7.594,331.607, 8.120,52.425,211.924, 8.701,29.729,226.966, 4.278,26.381,296.616, 8.711,14.516,748.508, 1.409,2.820,305.145, 6.020,22.872,1239.263, 6.868,103.610,468.834, 4.697,4.699,297.155, 3.195,43.450,251.116,
uc003jls.2	A8K2Y8	chr5	-	39107545	11	pla_solexa_sample_N0740972,pla_solexa_sample_N0740973,pla_solexa_sample_N0740977,pla_solexa_sample_N0740981,pla_solexa_sample_N0740983,pla_solexa_sample_N0740985,pla_solexa_sample_N0740986,pla_solexa_sample_N0740991,pla_solexa_sample_N0740997,pla_solexa_sample_N0740998,pla_solexa_sample_N0740999,	39105359,39105419,39105780,39106163,39106323,39106443,39106526,39106772,39107172,39107293,39107382,	5540.289,38.083,13.297,11.697,54.275,663.064,67.907,21.666,1891.443,45.473,22.095,	AATAAA,ATTAAA,multi,ATTAAA,AATAAA,ACTAAA,none,none,multi,ATTAAA,none,	12	378.055,1.815,1.210,1.210,1.815,84.684,9.679,3.025,213.527,1.210,0.605, 268.022,0.631,0.000,0.000,1.893,23.966,3.154,0.631,66.220,1.892,1.262, 497.411,4.431,1.266,0.000,3.797,89.865,8.228,2.532,277.819,6.962,3.798, 675.649,9.599,1.476,2.215,4.431,107.068,10.338,5.907,377.330,11.075,2.953, 446.685,1.450,0.725,1.450,6.526,84.115,5.076,4.350,258.874,2.900,0.725, 293.766,2.139,0.713,0.713,6.417,42.06…
uc003jlw.2	DAB2	chr5	-	39373527	3	pla_solexa_sample_N0742025,pla_solexa_sample_N0742038,pla_solexa_sample_N0742041,	39371786,39373142,39373299,	2533.162,2063.786,304.790,	AATAAA,AATAAA,multi,	12	105.858,137.916,10.284, 178.471,229.554,25.227, 352.493,217.062,33.542, 189.032,186.819,35.441, 260.324,123.998,11.601, 350.809,233.871,49.911, 180.017,109.750,18.002, 238.196,190.979,16.913, 45.745,22.271,5.418, 139.100,117.925,21.752, 263.098,278.952,28.776, 230.029,214.691,47.924,
uc003jny.2	B2RDA6	chr5	-	43446324	4	pla_solexa_sample_N0745221,pla_solexa_sample_N0745222,pla_solexa_sample_N0745229,pla_solexa_sample_N0745231,	43444714,43444781,43445326,43445433,	52.803,267.447,178.726,893.466,	AATAAA,multi,AATAAA,ATTAAA,	12	2.420,27.221,2.420,32.665, 5.046,16.399,11.983,42.884, 3.165,13.924,13.924,76.573, 3.692,19.934,12.551,50.212, 2.900,9.425,15.952,68.886, 7.130,23.529,11.408,63.460, 4.647,16.842,16.839,137.042, 4.230,18.323,8.458,45.806, 2.408,25.883,30.697,163.710, 8.585,58.388,32.627,110.482, 4.111,15.857,12.919,56.378, 4.473,21.726,8.946,45.367,
uc003jva.2	D3DWA0	chr5	+	67593429	9	pla_solexa_sample_N0764298,pla_solexa_sample_N0764302,pla_solexa_sample_N0764304,pla_solexa_sample_N0764308,pla_solexa_sample_N0764310,pla_solexa_sample_N0764313,pla_solexa_sample_N0764317,pla_solexa_sample_N0764330,pla_solexa_sample_N0764337,	67593571,67594059,67594188,67594432,67594575,67595037,67595935,67596866,67597646,	13.943,33.240,15.700,74.960,275.329,17.919,145.846,27.300,2778.413,	none,AAGAAA,multi,multi,multi,none,multi,none,AATAAA,	12	1.815,6.050,1.210,19.962,24.196,3.025,19.356,3.630,457.899, 0.631,2.523,2.523,2.524,13.877,1.262,13.244,3.153,230.183, 1.899,5.064,1.266,10.761,31.010,1.266,12.657,3.797,267.057, 2.215,3.691,2.214,4.429,32.489,1.476,16.981,3.692,166.880, 1.450,3.625,0.725,6.525,15.228,2.175,21.029,5.075,292.229, 0.713,2.852,0.713,2.139,24.242,0.713,9.269,0.000,176.830, 1.162,1.743,0.581,4.066,29.617,0.581,7.550,1…
uc003khu.2	NM_001025	chr5	-	81571928	9	pla_solexa_sample_N0778099,pla_solexa_sample_N0778103,pla_solexa_sample_N0778106,pla_solexa_sample_N0778108,pla_solexa_sample_N0778109,pla_solexa_sample_N0778111,pla_solexa_sample_N0778121,pla_solexa_sample_N0778125,pla_solexa_sample_N0778127,	81569143,81569356,81569507,81569721,81569770,81569852,81571420,81571640,81571886,	9853.416,14.656,12.292,17.131,74.888,43.353,186.088,473.873,18658.518,	AATAAA,TATAAA,none,multi,none,multi,multi,multi,multi,	12	976.286,0.605,1.210,3.025,9.074,4.840,7.259,43.553,1327.727, 1498.392,3.154,0.631,4.415,15.136,11.353,10.092,45.408,1672.449, 1254.281,1.899,0.000,1.266,10.126,4.431,13.291,29.114,2415.540, 938.526,2.952,2.215,3.691,8.860,3.691,19.197,45.042,1865.973, 798.377,0.000,4.351,1.450,5.800,2.175,10.877,23.204,1025.340, 787.896,2.139,1.426,0.713,6.417,1.426,12.121,46.345,1036.028, 681.729,0.581,0.581,1.1…
uc003khx.3	KISHA_HUMAN	chr5	-	82352903	17	pla_solexa_sample_N0778391,pla_solexa_sample_N0778396,pla_solexa_sample_N0778400,pla_solexa_sample_N0778401,pla_solexa_sample_N0778402,pla_solexa_sample_N0778406,pla_solexa_sample_N0778407,pla_solexa_sample_N0778409,pla_solexa_sample_N0778411,pla_solexa_sample_N0778416,pla_solexa_sample_N0778421,pla_solexa_sample_N0778422,pla_solexa_sample_N0778424,pla_solexa_sample_N0778425,pla_solexa_sample_N07…	82348668,82349184,82349656,82349874,82349918,82350684,82350841,82351000,82351113,82351630,82352007,82352121,82352201,82352294,82352480,82352655,82352844,	2058.258,22.176,98.275,110.794,33.215,44.327,15.756,68.627,53.284,10.963,17.713,1600.338,14.815,39.081,580.809,115.324,224.075,	AATAAA,none,ATTAAA,multi,AATAGA,ATTAAA,AATAAA,AGTAAA,none,multi,none,multi,none,none,ATTAAA,TATAAA,GATAAA,	12	160.902,2.420,4.840,6.049,2.420,4.235,1.210,8.470,4.235,0.000,3.025,58.071,1.210,6.050,24.197,1.210,7.865, 228.921,2.522,7.567,11.353,3.153,1.892,1.892,7.568,6.307,1.893,1.892,148.833,1.262,3.155,42.883,13.877,22.705, 168.333,1.266,5.696,8.862,1.899,5.696,0.633,4.431,5.697,1.266,0.000,93.662,0.000,3.165,44.299,7.596,11.393, 108.546,3.691,18.459,10.337,2.214,2.952,0.000,8.860,11.813,2.214,0.000,12…
uc003kjz.2	A8K6T8	chr5	-	90667217	6	pla_solexa_sample_N0783984,pla_solexa_sample_N0783985,pla_solexa_sample_N0783988,pla_solexa_sample_N0783990,pla_solexa_sample_N0783996,pla_solexa_sample_N0784000,	90664450,90664546,90664759,90664891,90665231,90665440,	40.289,4318.427,30.518,29.675,21.723,313.570,	ATTAAA,AATAAA,AGTAAA,AATAAA,none,AATAAA,	12	2.420,435.520,4.839,3.025,1.210,7.259, 4.416,378.382,2.523,4.416,1.262,18.920, 1.899,409.445,2.532,1.266,0.633,17.720, 1.476,282.812,4.430,5.169,2.214,18.460, 0.725,311.810,0.725,0.000,2.175,14.501, 3.565,251.697,0.713,0.713,0.000,10.695, 5.808,368.739,5.807,2.904,6.969,69.103, 4.228,497.534,2.819,1.410,0.705,8.456, 8.428,498.355,1.204,6.019,0.000,93.293, 1.144,205.506,1.144,1.716,2.289,12.592, 2…
uc003kmm.2	APPILS	chr5	-	96112100	6	pla_solexa_sample_N0790321,pla_solexa_sample_N0790337,pla_solexa_sample_N0790340,pla_solexa_sample_N0790341,pla_solexa_sample_N0790344,pla_solexa_sample_N0790347,	96110191,96111033,96111284,96111744,96111829,96111936,	977.454,148.390,29.882,179.098,629.159,27.256,	AATAAA,AATAAA,none,CATAAA,AATAAA,none,	12	70.773,4.839,0.605,3.025,14.518,3.025, 84.506,47.298,2.524,29.010,126.127,1.261, 77.840,1.899,1.899,3.165,17.088,1.266, 107.069,1.476,2.215,8.120,22.152,0.738, 48.584,2.175,2.900,5.075,20.303,1.450, 73.441,2.139,7.843,9.982,27.808,2.139, 87.686,1.743,2.323,9.292,13.937,0.581, 63.425,7.047,2.819,13.390,47.922,0.705, 52.966,0.000,0.602,1.806,14.446,0.602, 28.620,70.982,1.145,62.969,228.405,7.441, 1…
uc003krb.1	B2RE47	chr5	-	114860005	5	pla_solexa_sample_N0804601,pla_solexa_sample_N0804607,pla_solexa_sample_N0804614,pla_solexa_sample_N0804615,pla_solexa_sample_N0804624,	114856609,114857445,114858445,114858571,114859817,	2825.177,11.483,4572.964,14.090,17.031,	AATAAA,multi,multi,none,multi,	12	189.936,0.605,249.215,0.605,1.210, 263.607,1.261,657.758,0.631,1.262, 285.409,1.266,332.877,0.633,0.000, 204.540,2.214,339.667,1.476,1.476, 234.219,0.725,203.761,2.900,2.900, 240.290,0.000,274.514,2.139,3.565, 344.349,0.000,398.932,1.162,2.323, 141.649,0.000,365.048,2.114,0.705, 291.911,0.000,450.207,1.204,1.204, 222.109,1.144,501.458,0.000,0.572, 194.386,2.348,433.403,0.587,1.174, 212.775,1.917,…
uc003kxa.2	IRF1	chr5	-	131819643	6	pla_solexa_sample_N0819377,pla_solexa_sample_N0819381,pla_solexa_sample_N0819383,pla_solexa_sample_N0819384,pla_solexa_sample_N0819385,pla_solexa_sample_N0819393,	131817303,131818227,131818524,131818627,131818781,131819210,	847.700,189.978,130.021,23.924,9442.219,27.698,	AATAAA,multi,ACTAAA,TATAAA,multi,ACTAAA,	12	60.489,23.590,15.123,2.420,998.668,3.025, 141.895,11.351,11.984,0.631,901.816,5.046, 81.004,24.048,13.923,1.266,1185.308,1.266, 75.318,36.919,29.535,1.476,614.353,3.691, 42.059,15.228,7.976,0.725,628.692,0.725, 65.598,12.834,14.973,4.991,1088.791,2.139, 41.811,8.711,3.484,0.000,630.052,1.162, 71.177,18.323,12.686,2.115,537.703,2.819, 9.029,1.806,1.806,0.000,201.029,0.602, 100.176,12.021,4.578,1.7…
uc003lbt.2	HNRNPA0	chr5	-	137088838	7	pla_solexa_sample_N0824077,pla_solexa_sample_N0824078,pla_solexa_sample_N0824079,pla_solexa_sample_N0824085,pla_solexa_sample_N0824090,pla_solexa_sample_N0824091,pla_solexa_sample_N0824092,	137087076,137087264,137087366,137087929,137088308,137088358,137088547,	2040.212,1200.395,29.409,489.389,10103.427,49.175,49.274,	AATAAA,multi,none,multi,AATAAA,none,none,	12	108.277,85.290,3.025,24.801,789.982,4.840,8.469, 380.274,162.073,3.155,61.173,1717.855,7.568,6.306, 151.884,127.834,2.532,31.009,786.616,4.430,4.430, 125.529,84.916,3.690,44.303,598.114,2.215,3.691, 105.869,80.490,3.625,31.180,567.781,4.350,5.076, 188.238,124.065,2.852,19.251,567.570,7.130,0.713, 167.818,80.134,2.323,52.842,1020.272,3.484,3.484, 198.732,80.338,2.820,33.828,1001.408,5.638,5.638, 1…
uc003lnk.3	D3DQF5	chr5	-	143539961	8	pla_solexa_sample_N0832474,pla_solexa_sample_N0832481,pla_solexa_sample_N0832482,pla_solexa_sample_N0832483,pla_solexa_sample_N0832485,pla_solexa_sample_N0832488,pla_solexa_sample_N0832490,pla_solexa_sample_N0832491,	143537732,143538843,143538923,143539184,143539252,143539589,143539677,143539811,	1773.587,550.356,10.103,121.208,48.077,29.930,11.486,14.753,	ATTAAA,multi,AATAAA,AAGAAA,none,AGTAAA,AAGAAA,AGTAAA,	12	76.821,48.997,1.815,17.542,1.210,3.630,0.605,0.605, 239.644,37.839,1.892,6.938,2.522,0.000,1.262,0.631, 136.694,65.818,1.266,13.291,8.861,3.798,0.633,1.899, 148.422,63.504,0.000,19.937,8.861,1.476,0.738,1.476, 108.045,39.156,0.000,7.976,5.075,2.175,2.175,2.175, 83.423,35.650,0.000,5.704,4.278,2.852,0.713,0.000, 99.297,38.906,0.000,7.549,2.904,6.388,1.162,0.581, 224.102,33.121,2.115,15.504,2.819,2…
uc003mtp.2	FKHL7	chr6	+	1612342	5	pla_solexa_sample_N0859886,pla_solexa_sample_N0859889,pla_solexa_sample_N0859890,pla_solexa_sample_N0859894,pla_solexa_sample_N0859900,	1612647,1612903,1613054,1613727,1614126,	12.604,117.847,1163.847,42.584,2664.697,	ATTAAA,TATAAA,multi,AATATA,AATAAA,	12	1.210,6.050,28.431,3.629,168.159, 0.631,5.047,46.670,0.000,149.462, 0.633,6.329,59.488,6.962,167.069, 0.738,2.214,56.859,3.692,107.070, 0.725,5.800,50.033,4.350,187.808, 1.426,12.834,81.285,5.704,184.673, 1.742,18.003,170.724,2.904,256.084, 0.000,8.458,100.776,6.343,482.734, 3.010,22.271,287.698,1.806,276.864, 0.572,16.025,121.357,2.289,213.523, 0.000,5.873,78.107,2.349,308.315, 1.917,8.946,82.42…
uc003muf.2	BX640606	chr6	-	2890397	11	pla_solexa_sample_N0862320,pla_solexa_sample_N0862321,pla_solexa_sample_N0862322,pla_solexa_sample_N0862329,pla_solexa_sample_N0862333,pla_solexa_sample_N0862334,pla_solexa_sample_N0862336,pla_solexa_sample_N0862338,pla_solexa_sample_N0862343,pla_solexa_sample_N0862346,pla_solexa_sample_N0862348,	2887407,2887508,2887587,2888254,2888705,2888823,2888973,2889062,2889376,2890018,2890152,	454.253,4117.948,120.930,13.595,11277.191,251.864,25.088,14.470,56.455,34.309,22.339,	AATAAA,AATAAA,ATTAAA,ACTAAA,AATAAA,TATAAA,none,CATAAA,AGTAAA,AATAAA,multi,	12	108.275,274.012,32.665,0.000,1113.595,18.147,3.630,0.605,6.050,3.025,3.630, 5.046,307.752,1.893,0.631,1458.666,17.027,2.523,1.893,7.569,9.461,2.524, 13.290,475.261,2.532,1.266,561.960,17.087,2.532,2.531,3.165,1.266,1.266, 16.983,445.264,14.028,2.214,804.873,17.721,5.906,1.477,3.691,3.691,2.953, 75.413,191.436,26.103,1.450,762.118,36.255,1.450,1.450,4.350,2.900,1.450, 13.547,319.436,8.556,0.713,82…
uc003ocs.1	A9YWH7	chr6	-	33033124	2	pla_solexa_sample_N0895148,pla_solexa_sample_N0895150,	33032794,33032941,	35142.805,124.478,	AATAAA,multi,	12	177.837,21.777, 4193.733,6.938, 241.745,15.822, 9024.910,19.933, 12470.911,18.128, 7991.616,8.556, 116.137,9.872, 274.843,5.638, 37.920,0.000, 157.422,5.723, 317.712,0.587, 138.018,11.502,
uc003oql.2	FKHLA	chr6	+	41566674	5	pla_solexa_sample_N0904585,pla_solexa_sample_N0904586,pla_solexa_sample_N0904587,pla_solexa_sample_N0904588,pla_solexa_sample_N0904592,	41567696,41567809,41568363,41568457,41570120,	121.069,15.673,1618.144,32.354,907.548,	none,none,ATTAAA,none,AATAAA,	12	12.098,0.000,106.460,0.605,44.157, 18.289,4.415,188.559,7.567,138.741, 5.064,0.633,78.474,0.000,63.284, 9.598,0.738,90.826,1.476,40.612, 5.801,0.725,94.994,2.175,47.133, 12.121,0.713,176.832,2.852,76.294, 8.130,0.000,85.362,0.581,43.552, 13.388,1.410,169.133,3.524,58.493, 16.852,0.000,92.085,0.602,17.454, 4.580,2.289,233.558,8.014,220.391, 9.397,4.110,163.847,1.762,55.203, 5.751,0.639,138.016,3.1…
uc003osa.3	B2RE89	chr6	-	42176027	6	pla_solexa_sample_N0905541,pla_solexa_sample_N0905542,pla_solexa_sample_N0905549,pla_solexa_sample_N0905552,pla_solexa_sample_N0905553,pla_solexa_sample_N0905555,	42174435,42174540,42175302,42175482,42175592,42175786,	480.319,7392.145,155.439,81.014,21.598,1420.074,	AATAAA,multi,multi,AATATA,none,none,	12	26.010,417.375,10.888,2.420,0.000,59.281, 49.191,565.052,13.244,4.416,1.262,97.750, 24.050,536.646,13.923,3.798,0.633,51.895, 27.321,408.341,13.290,7.384,0.738,71.622, 26.829,382.145,15.227,1.450,2.900,44.232, 33.512,548.318,7.130,3.565,0.713,89.128, 67.362,1155.573,27.293,15.678,0.581,196.856, 21.142,312.896,10.571,2.115,1.410,76.113, 84.263,1677.431,18.659,16.252,4.816,295.528, 48.657,524.361,1…
uc003otf.2	NM_000287	chr6	-	42932073	2	pla_solexa_sample_N0906853,pla_solexa_sample_N0906855,	42931609,42931748,	147.693,250.013,	AATAAA,AATAAA,	12	26.616,2.420, 0.000,32.793, 25.946,4.430, 26.580,6.646, 17.402,15.227, 9.982,21.390, 5.227,13.938, 24.666,21.846, 1.806,2.408, 0.572,68.121, 0.587,35.236, 8.307,25.558,
uc003pao.3	B2RCF6	chr6	+	52269076	4	pla_solexa_sample_N0912916,pla_solexa_sample_N0912923,pla_solexa_sample_N0912926,pla_solexa_sample_N0912934,	52269526,52270608,52270945,52272573,	37.182,447.046,280.412,235.741,	AATAAA,multi,AATAAA,multi,	12	6.654,47.182,10.284,9.679, 1.892,25.860,17.029,0.631, 4.431,38.606,28.478,56.324, 4.431,63.502,27.320,5.907, 3.625,25.379,18.853,37.704, 3.565,39.215,20.677,14.260, 0.000,18.584,23.808,37.746, 2.114,39.465,25.371,22.551, 0.000,6.622,3.010,3.612, 1.144,32.053,17.173,4.579, 2.936,35.820,48.155,36.999, 6.390,74.760,40.255,5.751,
uc003pek.2	B2R6C8	chr6	+	64290079	18	pla_solexa_sample_N0918629,pla_solexa_sample_N0918631,pla_solexa_sample_N0918632,pla_solexa_sample_N0918633,pla_solexa_sample_N0918635,pla_solexa_sample_N0918639,pla_solexa_sample_N0918642,pla_solexa_sample_N0918644,pla_solexa_sample_N0918647,pla_solexa_sample_N0918649,pla_solexa_sample_N0918657,pla_solexa_sample_N0918660,pla_solexa_sample_N0918661,pla_solexa_sample_N0918667,pla_solexa_sample_N09…	64290098,64290276,64290385,64290493,64290723,64290940,64291026,64291075,64291211,64291359,64291912,64292257,64292330,64293051,64293119,64293281,64293411,64293487,	10.344,12.516,46.665,55.720,868.055,16.220,16.046,77.663,12.163,19744.587,12.150,12.175,534.805,10.144,10.341,19188.136,518.390,151.479,	AATAAA,TATAAA,AATACA,AGTAAA,ATTAAA,AGTAAA,none,AAGAAA,GATAAA,multi,multi,AATGAA,multi,AATATA,none,multi,ATTAAA,AATAAA,	12	0.605,0.605,6.050,1.210,18.752,0.605,3.630,6.654,2.420,767.602,0.000,1.815,16.940,0.000,0.000,485.120,19.963,3.025, 0.000,0.000,1.893,5.046,14.505,0.631,0.000,4.415,0.000,1020.373,0.000,0.000,11.352,0.631,0.000,244.058,19.551,4.416, 0.000,0.000,0.633,0.633,15.188,0.000,0.633,3.798,0.000,626.510,0.000,0.633,14.558,1.266,1.266,543.611,24.049,4.431, 0.000,0.738,3.691,2.215,16.244,0.000,0.738,7.384,0…
uc003pku.2	E1P501	chr6	-	86322600	18	pla_solexa_sample_N0933286,pla_solexa_sample_N0933289,pla_solexa_sample_N0933293,pla_solexa_sample_N0933305,pla_solexa_sample_N0933306,pla_solexa_sample_N0933307,pla_solexa_sample_N0933310,pla_solexa_sample_N0933313,pla_solexa_sample_N0933316,pla_solexa_sample_N0933319,pla_solexa_sample_N0933321,pla_solexa_sample_N0933322,pla_solexa_sample_N0933324,pla_solexa_sample_N0933327,pla_solexa_sample_N09…	86317509,86317827,86318054,86318967,86319017,86319078,86319302,86319472,86319728,86319990,86320157,86320204,86320473,86320809,86321041,86321135,86322289,86322366,	64.622,77.731,18869.074,10.374,40.286,13.319,13.775,22.459,39.924,85.870,60.815,357.200,31.000,1135.638,7217.131,104.874,1388.840,12.648,	AATAAA,AATAAA,AATAAA,none,none,multi,none,AAGAAA,multi,ATTAAA,GATAAA,ATTAAA,multi,multi,multi,AGTAAA,AATAAA,ATTAAA,	12	2.420,1.815,474.230,0.605,5.444,0.605,0.605,1.815,3.025,1.815,3.630,12.100,0.000,53.836,416.767,9.679,60.490,0.000, 10.092,8.198,2012.363,1.261,5.676,0.631,1.261,5.677,2.524,12.612,6.308,43.514,4.416,115.411,751.091,14.506,81.984,0.631, 6.329,6.963,1608.673,1.266,2.532,0.633,0.633,1.899,5.064,5.697,0.633,18.354,2.532,70.248,456.280,8.228,63.917,0.633, 3.691,4.430,875.762,0.738,2.953,2.215,1.477,0…
uc003pnm.2	B2R4U2	chr6	-	90346992	12	pla_solexa_sample_N0937038,pla_solexa_sample_N0937052,pla_solexa_sample_N0937054,pla_solexa_sample_N0937055,pla_solexa_sample_N0937058,pla_solexa_sample_N0937059,pla_solexa_sample_N0937060,pla_solexa_sample_N0937064,pla_solexa_sample_N0937067,pla_solexa_sample_N0937069,pla_solexa_sample_N0937070,pla_solexa_sample_N0937072,	90341946,90343564,90343943,90344002,90344939,90345007,90345435,90345681,90345856,90346177,90346244,90346581,	89.566,964.776,168.217,52.165,332.640,26.430,57.909,24.464,964.973,51.874,11.508,39.462,	AATAAA,multi,CATAAA,AATAAA,AGTAAA,none,AATACA,none,AATAAA,multi,none,multi,	12	5.445,52.021,7.865,6.049,22.986,3.025,4.839,0.605,59.885,3.630,0.605,1.815, 4.415,94.596,17.657,3.155,32.163,1.261,4.416,3.153,73.784,4.415,0.000,0.631, 8.861,81.637,13.924,4.431,34.807,3.165,6.962,1.266,113.912,11.392,1.899,7.595, 8.860,89.347,10.336,5.168,26.582,2.214,6.644,3.691,81.961,3.691,1.476,5.907, 9.426,69.613,15.226,3.625,30.455,1.450,10.151,6.526,56.559,3.625,0.000,1.450, 4.278,69.163…
uc003qhr.2	B2R767	chr6	+	138202456	6	pla_solexa_sample_N0977982,pla_solexa_sample_N0977985,pla_solexa_sample_N0977989,pla_solexa_sample_N0977994,pla_solexa_sample_N0977998,pla_solexa_sample_N0978000,	138202817,138203137,138203425,138203727,138204222,138204445,	14.278,18.353,44.669,764.730,561.126,2286.066,	none,none,CATAAA,AATAAA,multi,multi,	12	2.420,0.605,1.210,32.666,28.431,84.686, 0.000,1.261,0.631,51.711,76.311,235.229, 0.000,1.266,0.000,34.807,27.847,125.304, 2.953,3.691,1.476,67.193,33.224,176.478, 0.725,2.900,0.000,39.881,28.280,116.745, 1.426,0.000,0.713,66.310,30.659,133.335, 0.000,1.743,12.196,101.621,54.587,157.369, 1.409,1.410,0.705,44.399,44.401,182.522, 1.204,1.204,23.476,152.279,53.569,161.908, 2.861,1.716,0.000,59.533,70…
uc003qmz.2	NM_198887	chr6	-	150048105	8	pla_solexa_sample_N0991207,pla_solexa_sample_N0991212,pla_solexa_sample_N0991213,pla_solexa_sample_N0991215,pla_solexa_sample_N0991216,pla_solexa_sample_N0991218,pla_solexa_sample_N0991220,pla_solexa_sample_N0991221,	150045460,150046725,150046825,150047006,150047079,150047586,150047905,150047976,	661.706,146.743,12.358,14.129,35.418,105.609,11.008,20.415,	AATAAA,AATAAA,none,AGTAAA,multi,AATAAA,none,AGTAAA,	12	3.025,9.073,4.235,0.605,6.049,6.050,1.815,1.815, 0.000,8.200,1.262,1.262,2.524,6.308,1.262,0.000, 126.568,12.025,1.266,0.633,2.532,5.063,0.000,0.633, 115.192,14.029,1.476,1.477,4.429,14.027,2.215,5.169, 137.776,14.502,0.000,0.000,1.450,16.677,1.450,2.900, 0.713,12.121,0.000,0.000,2.139,5.704,0.000,0.713, 76.650,18.003,1.162,0.581,2.905,8.131,1.161,1.162, 0.705,9.868,0.000,0.000,3.524,11.276,0.705…
uc003spw.2	A4D2P0	chr7	+	6442077	5	pla_solexa_sample_N1016777,pla_solexa_sample_N1016779,pla_solexa_sample_N1016785,pla_solexa_sample_N1016793,pla_solexa_sample_N1016801,	6442243,6442315,6442885,6443104,6443595,	751.340,7961.308,213.656,43.899,34535.615,	CATAAA,ATTAAA,multi,multi,AATAAA,	12	67.144,453.664,23.592,0.605,1351.919, 17.030,454.059,29.644,5.046,4903.200, 158.844,1039.119,17.721,3.165,2758.534, 64.978,601.807,19.934,2.214,1953.103, 84.114,579.383,21.750,4.350,1643.883, 124.065,845.650,17.825,5.704,2502.727, 61.555,993.560,16.843,4.647,3431.878, 34.532,299.507,27.484,0.705,2088.088, 66.810,1097.823,15.050,4.816,4812.605, 11.447,500.316,8.584,5.723,3854.855, 5.873,225.510,1.…
uc003swi.2	NM_013293	chr7	-	23545178	3	pla_solexa_sample_N1030673,pla_solexa_sample_N1030674,pla_solexa_sample_N1030684,	23544404,23544624,23545081,	3519.249,4530.473,29.176,	AATAAA,multi,none,	12	111.906,429.470,2.420, 370.184,418.114,3.154, 230.354,305.665,1.899, 293.149,405.387,5.907, 404.626,483.667,7.251, 220.324,422.824,0.000, 261.312,251.439,1.162, 358.702,552.503,5.639, 208.853,281.079,0.000, 414.449,313.699,0.572, 377.025,295.395,1.174, 268.366,371.241,0.000,
uc003ung.1	CO1A2_HUMAN	chr7	+	94059705	5	pla_solexa_sample_N1079945,pla_solexa_sample_N1079946,pla_solexa_sample_N1079947,pla_solexa_sample_N1079950,pla_solexa_sample_N1079951,	94059907,94059950,94060014,94060355,94060532,	181.334,16.869,8120.585,34.370,5973.633,	AATACA,none,AATAAA,ATTAAA,multi,	12	10.283,1.210,486.933,0.000,148.804, 8.829,0.000,285.680,0.631,643.249, 18.986,0.633,1076.456,2.532,430.330, 8.122,1.476,505.813,1.477,201.586, 7.251,2.900,614.191,0.725,247.997, 67.738,6.417,2320.906,16.399,2795.066, 16.260,1.742,472.682,1.743,158.529, 11.276,0.000,527.837,1.410,286.118, 0.000,0.000,15.049,0.000,14.446, 8.014,0.572,310.835,5.724,365.218, 11.158,0.000,899.108,1.174,255.456, 13.419…
uc003usd.2	A4D298	chr7	-	99489786	3	pla_solexa_sample_N1084561,pla_solexa_sample_N1084562,pla_solexa_sample_N1084568,	99488028,99488525,99488835,	498.485,2627.121,86.339,	AATATA,multi,ATTAAA,	12	33.271,250.426,3.630, 49.821,326.671,5.677, 39.238,252.505,8.860, 58.332,141.033,11.076, 21.754,230.592,1.450, 51.336,169.700,2.139, 20.323,181.177,2.904, 62.718,150.106,8.456, 10.835,27.087,0.000, 69.267,264.468,25.188, 45.806,317.710,10.570, 35.784,315.650,6.390,
uc003uww.2	A4D2E7	chr7	+	100470925	2	pla_solexa_sample_N1085991,pla_solexa_sample_N1085993,	100471070,100471136,	8414.459,696.385,	AAGAAA,none,	12	251.633,1.210, 859.558,2.524, 457.543,77.208, 352.221,1.476, 405.351,73.237, 680.227,70.590, 894.844,86.525, 489.077,22.551, 1471.589,152.276, 1320.062,132.805, 285.409,0.587, 946.946,75.399,
uc003uzp.1	A5D6V8	chr7	-	102114096	2	pla_solexa_sample_N1087245,pla_solexa_sample_N1087248,	102113579,102113907,	412.475,1048.305,	AATAAA,AATAAA,	12	32.062,114.322, 59.282,165.858, 18.354,14.556, 25.104,21.412, 11.600,95.717, 32.798,42.067, 38.907,202.081, 23.960,45.807, 58.384,182.972, 34.343,16.026, 17.619,15.856, 60.063,131.628,
uc003vdo.2	NM_182715	chr7	-	105732251	10	pla_solexa_sample_N1091741,pla_solexa_sample_N1091743,pla_solexa_sample_N1091747,pla_solexa_sample_N1091748,pla_solexa_sample_N1091749,pla_solexa_sample_N1091753,pla_solexa_sample_N1091755,pla_solexa_sample_N1091756,pla_solexa_sample_N1091759,pla_solexa_sample_N1091761,	105730958,105731063,105731199,105731299,105731393,105731798,105731908,105731989,105732090,105732145,	3640.861,12.043,10.888,35.635,121.400,12.369,22.743,11.611,12.432,2172.221,	multi,none,CATAAA,AATGAA,AGTAAA,CATAAA,none,AATGAA,CATAAA,AATAAA,	12	228.043,0.605,0.605,0.000,14.519,0.605,4.235,1.210,0.000,215.341, 455.953,0.631,1.261,8.199,22.702,1.892,5.677,2.523,1.262,129.913, 358.188,1.266,0.633,2.532,6.961,1.266,0.633,0.000,0.633,191.118, 260.661,0.738,2.214,2.953,14.029,2.953,0.000,0.738,0.738,195.680, 221.164,0.000,0.000,2.175,9.426,0.725,1.450,2.175,1.450,170.407, 270.950,1.426,0.000,2.852,4.991,0.000,0.000,0.713,0.000,173.977, 291.50…
uc003vej.2	BAP29	chr7	+	107258808	7	pla_solexa_sample_N1093815,pla_solexa_sample_N1093823,pla_solexa_sample_N1093826,pla_solexa_sample_N1093831,pla_solexa_sample_N1093836,pla_solexa_sample_N1093845,pla_solexa_sample_N1093846,	107259101,107259587,107259896,107260294,107260917,107263755,107263867,	165.914,11.276,92.453,14.246,1380.128,1131.161,17.654,	AATAAA,none,multi,AATATA,multi,ATTAAA,TATAAA,	12	7.865,0.000,2.420,0.000,91.338,26.011,0.605, 15.136,1.893,4.415,2.522,73.155,60.542,1.262, 16.455,0.633,5.696,0.633,143.022,56.956,0.000, 8.122,2.952,7.383,2.214,75.316,47.257,0.000, 7.977,1.450,9.426,1.450,94.267,47.859,0.000, 10.695,0.000,9.269,2.139,98.398,51.336,1.426, 22.067,0.581,15.098,0.581,182.918,229.952,3.485, 7.753,0.705,2.819,0.000,74.698,35.235,0.705, 33.104,0.000,12.641,0.000,231.7…
uc003wff.2	A8K4K6	chr7	-	148700886	2	pla_solexa_sample_N1128610,pla_solexa_sample_N1128611,	148700157,148700541,	3030.338,11133.824,	AATAAA,none,	12	215.341,537.748, 80.092,986.321, 260.098,756.879, 237.026,702.229, 283.527,647.542, 364.356,792.884, 193.370,1172.415, 307.260,819.587, 442.381,1234.454, 208.370,1456.292, 172.070,1023.021, 266.447,1004.454,
uc003wuh.2	AK057726	chr8	+	11696118	6	pla_solexa_sample_N1144842,pla_solexa_sample_N1144843,pla_solexa_sample_N1144845,pla_solexa_sample_N1144847,pla_solexa_sample_N1144850,pla_solexa_sample_N1144852,	11696121,11696173,11696289,11696468,11696677,11696805,	20.336,6487.364,18.732,3854.445,76.317,3831.028,	none,CATAAA,none,ATTAAA,AATAAA,multi,	12	3.630,709.531,2.420,263.733,4.235,199.614, 0.631,271.803,0.631,209.371,3.784,184.776, 1.899,540.443,0.633,260.100,4.431,228.456, 0.738,562.670,2.953,244.411,5.169,260.659, 2.901,327.760,2.900,150.100,3.625,126.174, 0.713,383.608,0.713,244.567,4.278,171.838, 2.903,745.608,1.743,530.752,9.291,651.535, 2.114,358.702,0.705,262.156,4.228,256.520, 3.010,1332.555,2.408,990.692,14.446,817.951, 0.572,340.…
uc003xmk.2	B2RBK4	chr8	-	38848851	8	pla_solexa_sample_N1164483,pla_solexa_sample_N1164490,pla_solexa_sample_N1164495,pla_solexa_sample_N1164498,pla_solexa_sample_N1164499,pla_solexa_sample_N1164500,pla_solexa_sample_N1164504,pla_solexa_sample_N1164510,	38846331,38847331,38847616,38847925,38848048,38848325,38848496,38848655,	722.091,23.009,65.779,21.758,244.968,5791.712,19.424,14.321,	AATAAA,AATAAA,ATTAAA,AATAAA,AATAAA,multi,none,none,	12	55.045,1.815,0.605,0.605,16.334,218.366,2.420,1.210, 62.435,0.631,5.046,2.523,10.721,564.422,0.631,5.676, 75.941,2.532,3.165,1.266,22.150,447.419,1.899,0.633, 59.810,2.215,6.644,2.953,8.860,331.547,2.215,0.000, 69.612,1.450,5.076,0.725,21.754,387.948,7.251,0.000, 67.024,2.139,4.991,0.713,39.216,467.034,0.713,0.000, 30.777,2.903,2.323,1.742,13.358,508.108,0.581,2.903, 63.425,1.409,3.524,0.705,16.9…
uc003xuy.2	B3KXL4	chr8	+	64122264	11	pla_solexa_sample_N1179756,pla_solexa_sample_N1179757,pla_solexa_sample_N1179762,pla_solexa_sample_N1179763,pla_solexa_sample_N1179764,pla_solexa_sample_N1179766,pla_solexa_sample_N1179767,pla_solexa_sample_N1179769,pla_solexa_sample_N1179781,pla_solexa_sample_N1179784,pla_solexa_sample_N1179785,	64122725,64122820,64123100,64123197,64123303,64123473,64123608,64123920,64125012,64125159,64125342,	58.556,10.829,14.361,1670.853,420.618,25.405,130.116,41.648,51.329,97.403,1343.797,	ATTAAA,AGTAAA,none,multi,ATTAAA,ATTAAA,AATACA,AATAAA,multi,multi,AATAAA,	12	4.235,1.210,0.000,56.256,21.777,1.210,11.493,1.815,4.839,6.049,87.707, 2.523,1.262,4.415,184.147,45.408,3.785,11.352,2.524,5.046,6.306,147.569, 3.165,0.633,0.633,90.496,27.846,1.899,9.494,1.899,9.494,11.393,106.317, 5.167,2.953,2.954,99.685,28.059,2.215,8.121,2.214,3.690,13.291,114.454, 5.075,0.725,0.000,78.315,29.005,2.900,10.151,2.900,4.350,7.251,96.443, 1.426,0.000,1.426,93.407,23.529,1.426,7.…
uc003yrx.2	C5HU08	chr8	+	126448713	5	pla_solexa_sample_N1228180,pla_solexa_sample_N1228181,pla_solexa_sample_N1228184,pla_solexa_sample_N1228188,pla_solexa_sample_N1228199,	126449051,126449146,126449475,126449665,126450641,	150.918,145.390,10.395,34.546,5979.585,	AATAAA,AATAAA,none,ATTAAA,AATAAA,	12	6.654,1.815,0.000,0.605,326.638, 15.137,10.722,3.153,5.677,516.493, 5.696,5.064,0.000,0.633,636.634, 4.428,3.690,0.738,2.214,544.948, 7.251,1.450,0.725,1.450,303.107, 11.408,9.269,0.000,2.139,613.918, 27.294,30.776,1.743,5.807,403.000, 3.524,5.639,0.000,0.000,358.702, 35.513,49.358,0.602,3.612,429.741, 10.302,10.875,3.435,2.289,694.377, 6.460,5.873,0.000,1.175,334.154, 17.253,10.863,0.000,8.946,8…
uc003ztm.2	CDC34B	chr9	+	33917235	6	pla_solexa_sample_N1264675,pla_solexa_sample_N1264676,pla_solexa_sample_N1264677,pla_solexa_sample_N1264680,pla_solexa_sample_N1264683,pla_solexa_sample_N1264695,	33917431,33917505,33917684,33917982,33918225,33920395,	12.370,92.275,15.331,3746.917,29.812,3474.582,	none,none,AAGAAA,AATAAA,AATACA,AATAAA,	12	0.000,9.074,1.815,225.623,2.420,258.289, 1.892,8.199,1.892,331.715,3.153,35.318, 0.633,1.899,2.532,311.989,1.899,199.979, 1.476,8.121,2.214,301.272,2.215,297.578, 1.450,4.350,0.725,193.611,2.175,333.561, 2.139,4.991,0.000,248.846,4.278,344.392, 0.581,9.292,1.161,378.612,2.904,305.442, 0.705,6.342,1.410,278.364,4.229,264.976, 1.204,13.242,2.408,459.233,2.408,420.714, 2.288,10.875,0.000,349.193,1.1…
uc004bfe.1	J3KN16	chr9	-	114124310	2	pla_solexa_sample_N1308391,pla_solexa_sample_N1308399,	114122977,114124170,	361.958,3236.616,	AATAAA,multi,	12	6.655,232.277, 55.496,228.292, 16.454,270.857, 14.768,225.214, 20.303,201.585, 19.964,382.180, 33.679,245.052, 25.371,288.232, 45.744,456.825, 95.597,250.730, 9.396,162.085, 18.531,293.285,
uc004blh.2	BND7	chr9	-	124103480	8	pla_solexa_sample_N1317056,pla_solexa_sample_N1317057,pla_solexa_sample_N1317069,pla_solexa_sample_N1317072,pla_solexa_sample_N1317074,pla_solexa_sample_N1317075,pla_solexa_sample_N1317076,pla_solexa_sample_N1317086,	124101267,124101358,124102184,124102354,124102434,124102511,124102603,124103352,	35.366,10344.589,17.351,7669.985,52.643,37.103,13.268,78.396,	none,AATAAA,none,AATAAA,AGTAAA,multi,none,TATAAA,	12	0.000,768.207,1.210,245.585,1.210,1.815,2.420,9.075, 2.524,609.195,2.523,618.657,5.678,2.524,0.000,8.200, 4.431,1451.093,1.899,470.831,1.266,5.696,1.266,5.696, 1.476,577.441,1.477,462.248,3.691,2.214,2.214,4.430, 2.175,638.121,0.725,467.714,3.625,2.900,0.725,10.150, 4.991,810.000,0.000,435.659,4.991,0.713,0.713,2.139, 1.162,1210.740,3.485,995.883,5.808,3.484,4.066,12.196, 1.409,584.214,0.000,267.…
uc004bma.2	B3KQ89	chr9	-	125004163	6	pla_solexa_sample_N1317758,pla_solexa_sample_N1317759,pla_solexa_sample_N1317761,pla_solexa_sample_N1317771,pla_solexa_sample_N1317773,pla_solexa_sample_N1317774,	125001834,125001973,125002290,125003658,125003785,125003950,	72.490,13.390,1232.644,17.958,366.270,2057.719,	AGTAAA,none,AATAAA,none,multi,AATAAA,	12	5.444,1.815,65.932,1.815,18.754,102.227, 4.416,0.631,143.784,2.522,36.580,146.309, 5.064,1.899,84.802,1.899,17.722,75.944, 6.643,1.476,104.116,2.214,22.149,117.405, 8.701,2.900,56.560,0.725,20.300,73.964, 4.991,0.000,83.424,1.426,20.677,173.264, 8.129,0.000,99.299,0.000,46.455,278.149, 1.410,3.524,100.070,1.409,20.437,82.451, 6.020,0.000,102.320,1.204,40.330,370.158, 7.441,1.144,168.299,2.290,60.…
uc004cey.2	BIG3	chr9	+	137023115	3	pla_solexa_sample_N1332116,pla_solexa_sample_N1332118,pla_solexa_sample_N1332122,	137023414,137023804,137025087,	787.141,2029.860,2447.778,	AGTAAA,AATAAA,multi,	12	32.664,70.773,122.793, 27.750,141.894,346.219, 36.706,68.979,128.467, 38.394,97.472,90.824, 29.004,84.116,100.794, 54.190,161.856,211.056, 148.078,346.674,315.315, 26.780,87.386,237.490, 267.840,568.174,364.138, 41.785,155.704,249.014, 33.473,135.659,139.182, 50.478,111.179,142.490,
uc004cfe.2	CO5A1_HUMAN	chr9	+	137734149	5	pla_solexa_sample_N1332292,pla_solexa_sample_N1332300,pla_solexa_sample_N1332308,pla_solexa_sample_N1332309,pla_solexa_sample_N1332312,	137734750,137735510,137736389,137736472,137736685,	603.569,2896.768,8281.004,36.897,408.880,	multi,AATAAA,AATAAA,multi,AATAAA,	12	10.889,42.342,137.309,0.605,4.235, 35.946,331.717,715.773,7.568,44.776, 20.885,94.928,358.820,1.266,17.088, 11.075,64.242,164.667,0.738,10.337, 19.579,88.466,387.223,2.175,24.655, 151.872,820.694,2501.300,4.991,83.424, 71.424,265.374,807.160,4.065,34.262, 14.798,62.018,372.797,3.523,16.210, 122.184,393.631,1532.981,6.622,77.643, 55.524,325.716,542.677,1.717,44.649, 15.270,94.549,276.602,2.349,23.…
uc004cuk.2	B3KUS1	chr23	+	11139930	3	pla_solexa_sample_N2245560,pla_solexa_sample_N2245571,pla_solexa_sample_N2245574,	11139996,11141035,11141192,	974.510,47.928,3252.456,	multi,ATTAAA,AATAAA,	12	58.675,1.815,239.534, 64.958,5.045,561.903, 67.082,3.798,277.183, 61.286,2.953,181.651, 36.256,4.351,197.236, 44.208,4.278,260.252, 146.918,2.904,225.308, 62.720,2.114,331.923, 171.538,2.408,240.752, 91.588,9.731,247.868, 65.773,4.698,217.289, 103.513,3.834,271.561,
uc004erl.2	A6NFE9	chr23	+	118717218	5	pla_solexa_sample_N2297814,pla_solexa_sample_N2297816,pla_solexa_sample_N2297817,pla_solexa_sample_N2297825,pla_solexa_sample_N2297836,	118717248,118717327,118717435,118717776,118718384,	12.302,2962.842,76.055,10.784,3143.270,	none,ATTAAA,none,none,AATAAA,	12	0.000,209.291,6.654,1.210,139.730, 0.631,104.056,8.830,1.262,363.879, 0.633,234.151,5.064,0.000,236.052, 2.953,251.798,5.906,2.953,266.563, 2.900,232.044,7.251,0.725,145.026, 0.713,323.001,4.278,0.713,178.257, 0.581,275.246,6.969,0.581,323.444, 2.115,158.561,2.820,2.114,270.612, 1.204,674.103,6.622,0.000,269.643, 0.572,123.074,5.722,0.000,321.714, 0.000,139.184,7.634,0.587,316.533, 0.000,238.335,…
uc004esy.2	A8K246	chr23	-	119760065	3	pla_solexa_sample_N2299334,pla_solexa_sample_N2299337,pla_solexa_sample_N2299339,	119759656,119759789,119759909,	3370.108,412.569,662.154,	multi,AATAAA,multi,	12	269.783,20.567,35.689, 271.177,37.841,46.669, 327.815,31.643,70.247, 286.501,47.994,82.700, 384.320,29.728,42.782, 415.690,34.937,54.190, 193.950,35.424,41.808, 263.565,29.599,44.398, 273.859,27.086,42.132, 241.564,43.501,69.264, 155.625,27.602,43.457, 286.261,46.646,88.817,
uc009xfw.2	AK309579	chr1	-	234742883	12	pla_solexa_sample_N0200624,pla_solexa_sample_N0200625,pla_solexa_sample_N0200632,pla_solexa_sample_N0200634,pla_solexa_sample_N0200636,pla_solexa_sample_N0200640,pla_solexa_sample_N0200642,pla_solexa_sample_N0200643,pla_solexa_sample_N0200652,pla_solexa_sample_N0200653,pla_solexa_sample_N0200656,pla_solexa_sample_N0200658,	234740018,234740102,234740655,234740819,234740969,234741302,234741513,234741681,234742430,234742496,234742665,234742827,	3325.363,31.516,17.114,33.824,22.646,39.726,2181.479,154.542,39.339,2846.804,111.213,21.187,	multi,none,ATTAAA,AATACA,CATAAA,AATACA,multi,multi,none,multi,multi,ATTAAA,	12	186.912,2.420,1.210,4.235,1.210,0.000,135.495,20.567,4.840,163.925,5.445,3.024, 353.789,3.154,1.893,4.415,1.261,2.523,247.839,15.137,3.154,206.221,8.199,2.523, 342.368,5.697,1.899,6.329,2.532,3.165,176.563,13.291,2.532,313.256,17.088,1.266, 285.767,2.952,1.476,3.691,1.476,4.429,183.125,18.460,7.383,207.495,8.858,2.214, 189.260,1.450,0.725,3.625,0.725,2.175,135.598,13.051,2.175,208.840,7.250,0.725…
uc009ygq.2	B2R9Z3	chr11	-	14300883	5	pla_solexa_sample_N1454936,pla_solexa_sample_N1454941,pla_solexa_sample_N1454946,pla_solexa_sample_N1454948,pla_solexa_sample_N1454949,	14299471,14300062,14300300,14300403,14300472,	1208.115,13.051,829.575,246.599,10.958,	ATTAAA,multi,multi,AATACA,AATATA,	12	42.948,0.000,41.739,12.704,2.420, 80.091,1.262,13.875,6.307,0.000, 60.120,0.000,44.935,13.290,0.000, 88.610,0.000,62.026,14.767,0.000, 51.484,1.450,37.706,12.327,0.725, 44.920,0.713,35.650,7.130,0.000, 199.175,2.324,188.726,51.681,2.324, 54.967,0.705,28.894,10.572,0.000, 344.275,4.816,265.431,77.042,4.213, 88.727,1.144,31.480,9.159,0.000, 71.646,0.000,37.585,18.205,0.000, 81.148,0.639,41.533,13.4…
uc010fbt.1	BC062760	chr2	-	54092710	4	pla_solexa_sample_N0257888,pla_solexa_sample_N0257892,pla_solexa_sample_N0257896,pla_solexa_sample_N0257897,	54091209,54091640,54092010,54092068,	1724.636,11.189,2651.656,64.738,	AATAAA,none,AATAAA,AATAGA,	12	75.612,0.000,179.048,6.654, 173.427,0.000,157.660,3.785, 184.788,0.000,250.604,3.798, 160.235,1.477,228.906,8.122, 159.531,0.725,186.359,5.076, 159.717,1.426,257.400,6.417, 126.592,0.581,231.697,3.484, 104.299,0.000,166.314,3.523, 108.338,0.602,294.918,3.612, 215.239,5.151,208.941,10.303, 79.869,0.587,155.626,2.935, 176.993,0.639,334.180,7.029,
uc010fsg.2	MYO1B	chr2	+	192288686	5	pla_solexa_sample_N0371498,pla_solexa_sample_N0371499,pla_solexa_sample_N0371514,pla_solexa_sample_N0371515,pla_solexa_sample_N0371516,	192288827,192288897,192289885,192290041,192290108,	1213.942,37.657,3248.571,496.195,192.555,	AATAAA,AATACA,AATAAA,TATAAA,CATAAA,	12	29.641,0.605,113.719,8.469,4.840, 86.399,3.153,304.600,56.129,27.119, 67.715,1.899,260.098,42.403,15.822, 51.686,2.215,175.002,26.580,8.859, 70.337,1.450,241.470,31.906,17.401, 132.622,5.704,335.122,48.486,21.390, 206.147,5.227,394.288,44.135,22.067, 57.083,1.410,178.296,33.827,11.980, 244.966,4.816,425.528,68.015,25.883, 117.350,5.150,406.434,76.131,18.317, 81.629,4.110,189.099,21.142,10.571, 68…
uc010jnz.2	NM_001145549	chr6	-	7883377	7	pla_solexa_sample_N0867836,pla_solexa_sample_N0867837,pla_solexa_sample_N0867841,pla_solexa_sample_N0867851,pla_solexa_sample_N0867852,pla_solexa_sample_N0867853,pla_solexa_sample_N0867854,	7881754,7881822,7881908,7882620,7882731,7882874,7883049,	11395.326,18.119,10.107,18.506,66.271,24.365,1037.052,	AATAAA,AAGAAA,none,none,none,none,multi,	12	592.788,1.210,0.605,0.000,6.654,2.420,75.008, 311.534,0.631,0.000,1.262,1.892,0.000,53.607, 2359.211,3.165,2.532,1.266,5.697,1.899,91.765, 1176.295,1.477,0.000,1.477,6.644,0.738,108.539, 809.977,0.725,0.725,2.175,2.900,5.076,60.910, 1300.564,0.713,1.426,4.991,5.704,1.426,91.977, 721.218,2.323,2.904,0.581,5.227,2.903,45.874, 798.449,0.705,0.705,0.705,2.114,5.637,93.729, 687.947,1.204,0.000,0.000,1…
uc010jvg.2	AK309888	chr6	-	33740405	3	pla_solexa_sample_N0896125,pla_solexa_sample_N0896126,pla_solexa_sample_N0896127,	33738992,33739071,33739177,	8048.909,76.738,4614.001,	AATAAA,none,AATAAA,	12	409.509,3.630,323.011, 864.603,10.090,368.291, 541.077,8.227,337.302, 568.578,8.122,255.493, 656.973,11.602,521.374, 672.385,2.852,577.551, 627.150,4.065,404.161, 486.965,6.342,294.571, 530.857,6.019,485.112, 1285.712,8.587,403.574, 776.368,5.285,288.937, 628.743,1.917,354.626,
uc010mji.2	AK125989	chr9	-	32457120	6	pla_solexa_sample_N1262713,pla_solexa_sample_N1262715,pla_solexa_sample_N1262716,pla_solexa_sample_N1262725,pla_solexa_sample_N1262727,pla_solexa_sample_N1262730,	32455302,32455706,32455793,32456882,32457008,32457073,	1613.846,662.027,97.812,31.150,529.839,10.953,	TATAAA,AATACA,ATTAAA,ATTAAA,AATATA,none,	12	292.158,68.354,18.147,7.260,67.144,1.815, 296.399,33.424,2.524,0.631,23.334,0.000, 208.837,12.657,0.633,0.000,23.415,0.000, 81.225,39.874,8.121,2.214,31.011,0.738, 105.143,25.379,6.525,0.725,15.953,0.725, 295.906,23.529,4.991,1.426,30.659,1.426, 47.617,65.038,5.226,3.485,37.746,0.581, 148.697,25.370,2.818,1.410,23.255,0.705, 1.806,42.132,6.622,3.612,54.171,2.408, 98.459,62.967,10.876,2.289,33.201…
uc010mvi.2	AK001729	chr9	-	123151514	2	pla_solexa_sample_N1314810,pla_solexa_sample_N1314813,	123151155,123151474,	2365.922,91.256,	ATTAAA,AATAAA,	12	244.374,0.605, 124.866,7.569, 204.405,1.266, 138.083,19.937, 245.821,8.702, 155.438,6.417, 295.569,4.065, 135.306,16.208, 380.385,1.806, 124.792,8.586, 182.052,5.873, 134.821,10.224,
uc010qdw.1	AK304720	chr10	-	29747176	3	pla_solexa_sample_N1360764,pla_solexa_sample_N1360766,pla_solexa_sample_N1360777,	29746291,29746365,29746927,	610.200,1340.968,16.088,	AATAAA,AATAAA,AATAAA,	12	2.420,48.996,0.605, 182.257,352.528,3.154, 3.798,74.042,2.532, 62.762,97.469,0.738, 0.725,41.332,0.000, 115.510,159.717,0.713, 16.259,80.135,1.162, 28.190,71.177,0.705, 23.476,60.188,1.806, 105.900,178.600,2.861, 1.174,60.489,1.174, 67.732,116.293,0.639,
uc010sfy.1	A8K5J8	chr12	-	7187836	2	pla_solexa_sample_N1553501,pla_solexa_sample_N1553503,	7187518,7187726,	5451.280,4996.581,	multi,ATTAAA,	12	407.697,432.493, 539.197,308.382, 615.118,579.681, 369.208,278.381, 434.353,451.037, 580.405,521.936, 335.640,288.604, 392.529,572.937, 106.537,72.829, 443.643,249.582, 520.903,589.616, 706.056,651.105,
uc010sjl.1	B3KMZ3	chr12	-	27126898	6	pla_solexa_sample_N1577314,pla_solexa_sample_N1577316,pla_solexa_sample_N1577329,pla_solexa_sample_N1577334,pla_solexa_sample_N1577336,pla_solexa_sample_N1577341,	27124520,27124605,27125530,27126421,27126583,27126730,	1476.798,68.217,17.936,14.253,10041.410,109.107,	multi,none,AATATA,AATACA,ATTAAA,none,	12	44.762,3.630,1.815,0.000,292.765,12.703, 120.453,2.523,0.631,0.631,807.847,1.262, 106.318,11.391,1.266,1.266,338.572,11.393, 48.733,2.953,1.476,0.000,440.833,16.982, 67.437,2.900,0.000,1.450,349.516,12.326, 213.907,12.834,1.426,2.852,721.585,22.103, 77.232,1.161,1.162,1.161,482.555,1.161, 70.473,3.523,2.820,2.819,601.128,4.229, 50.560,2.408,1.204,0.000,414.695,9.030, 357.776,5.724,1.717,3.433,396…
uc010ssw.1	C12orf31	chr12	-	66517620	3	pla_solexa_sample_N1614723,pla_solexa_sample_N1614727,pla_solexa_sample_N1614729,	66516851,66517418,66517508,	556.856,12.764,133.660,	AATAAA,AATAAA,AATGAA,	12	4.235,1.210,9.073, 46.038,0.631,11.982, 75.309,0.633,8.860, 1.476,0.738,12.551, 29.729,0.725,4.350, 39.930,2.139,9.269, 62.135,0.581,9.872, 53.558,0.705,13.390, 99.913,1.204,18.659, 97.315,0.572,13.165, 36.996,2.349,5.873, 10.224,1.278,16.614,
uc010tfc.1	E9PDQ9	chr13	-	41507561	4	pla_solexa_sample_N1692472,pla_solexa_sample_N1692473,pla_solexa_sample_N1692474,pla_solexa_sample_N1692475,	41506064,41506166,41506222,41506370,	29.737,5008.617,19.200,2034.169,	AATAAA,multi,none,multi,	12	1.815,312.122,3.630,342.970, 4.415,704.422,2.523,198.652, 1.266,306.295,0.000,184.156, 3.690,308.658,1.476,155.803, 2.175,345.889,0.725,204.487, 2.139,215.333,2.139,176.118, 0.581,299.057,0.581,70.843, 2.819,682.173,2.820,302.325, 1.204,119.774,0.000,58.383, 2.862,486.580,1.144,71.554, 2.936,774.017,3.523,132.134, 3.834,454.303,0.639,136.739,
uc010tpc.1	AB383849	chr14	+	24906491	8	pla_solexa_sample_N1742444,pla_solexa_sample_N1742450,pla_solexa_sample_N1742452,pla_solexa_sample_N1742454,pla_solexa_sample_N1742455,pla_solexa_sample_N1742456,pla_solexa_sample_N1742471,pla_solexa_sample_N1742476,	24906660,24907092,24907414,24907608,24907686,24907750,24909148,24910545,	20.663,14.211,57.196,4860.680,26.804,20.332,26.503,4606.928,	CATAAA,none,TATAAA,CATAAA,none,AATGAA,none,AATAAA,	12	1.210,0.605,7.260,347.208,2.420,0.605,6.654,370.796, 1.892,1.262,6.937,565.051,2.522,2.524,2.523,554.329, 3.798,3.165,3.165,402.484,1.266,1.899,2.532,391.091, 2.953,2.214,4.429,424.584,1.477,0.738,3.691,481.445, 2.900,0.000,6.526,395.921,4.350,1.450,2.900,348.066, 1.426,4.278,4.991,531.203,2.139,2.852,0.713,390.738, 1.743,0.000,1.742,323.444,3.484,2.324,0.581,249.119, 0.000,1.409,2.115,369.274,2.…
uc010wbb.1	AK294056	chr17	-	27233201	4	pla_solexa_sample_N1975173,pla_solexa_sample_N1975175,pla_solexa_sample_N1975182,pla_solexa_sample_N1975187,	27232272,27232448,27232769,27233049,	5917.738,111.409,2430.582,11.673,	TATAAA,AATACA,ATTAAA,AAGAAA,	12	322.405,8.469,241.955,1.210, 1020.372,9.461,119.192,0.631, 458.176,8.861,267.058,1.266, 266.565,10.337,298.318,0.738, 522.097,10.876,251.621,2.175, 771.495,10.695,196.794,0.713, 346.673,6.970,181.175,0.000, 355.177,9.161,133.898,1.410, 325.014,5.418,96.301,0.000, 512.338,9.730,194.057,1.717, 658.327,10.571,184.403,1.174, 359.099,10.863,265.811,0.639,
uc010ymj.1	AK316532	chr2	+	29022169	11	pla_solexa_sample_N0234362,pla_solexa_sample_N0234363,pla_solexa_sample_N0234366,pla_solexa_sample_N0234369,pla_solexa_sample_N0234376,pla_solexa_sample_N0234379,pla_solexa_sample_N0234380,pla_solexa_sample_N0234381,pla_solexa_sample_N0234383,pla_solexa_sample_N0234398,pla_solexa_sample_N0234399,	29022388,29022424,29022735,29023498,29023901,29024133,29024231,29024380,29024512,29025658,29025798,	19.422,12.300,31.611,25.401,1984.857,31.354,250.424,44.607,1154.789,452.664,2314.509,	none,ATTAAA,multi,none,AGTAAA,AATAAA,ATTAAA,multi,multi,AATAAA,multi,	12	1.210,1.210,1.815,2.420,116.139,2.420,9.678,2.420,49.601,14.519,160.296, 5.046,0.631,3.786,1.893,288.204,2.523,28.379,4.416,110.993,42.885,205.589, 0.000,1.266,0.633,3.165,159.476,3.798,25.314,2.532,130.367,54.426,313.255, 2.952,1.476,2.214,2.214,159.496,3.690,21.413,5.168,87.131,34.702,203.803, 3.625,0.000,3.625,1.450,102.243,2.900,13.052,1.450,72.512,50.761,210.288, 0.000,0.713,2.139,1.426,134.…
uc010zho.1	AK303954	chr2	-	202488978	8	pla_solexa_sample_N0381576,pla_solexa_sample_N0381577,pla_solexa_sample_N0381579,pla_solexa_sample_N0381599,pla_solexa_sample_N0381602,pla_solexa_sample_N0381603,pla_solexa_sample_N0381605,pla_solexa_sample_N0381606,	202484910,202485046,202485186,202488214,202488424,202488527,202488743,202488831,	3498.729,228.130,13.591,17.312,500.033,226.933,55.810,186.973,	multi,multi,AATAAA,AATAAA,multi,AATAAA,AATGAA,AATAGA,	12	26.012,15.123,0.000,1.815,11.493,4.235,0.605,3.630, 1157.219,69.373,3.153,4.415,44.144,18.920,6.938,19.555, 139.223,2.532,0.000,1.266,22.151,10.126,2.532,12.659, 98.205,20.674,0.000,0.000,15.506,7.384,3.691,14.027, 171.132,42.782,0.725,0.725,20.304,15.953,2.175,5.075, 183.962,3.565,0.713,1.426,73.441,39.216,4.278,17.825, 181.177,5.225,0.581,1.742,79.556,21.487,8.131,17.420, 190.978,21.143,1.410,0…
uc011ave.1	NM_004628	chr3	-	14187441	2	pla_solexa_sample_N0430671,pla_solexa_sample_N0430674,	14186651,14186788,	9730.270,1686.318,	multi,multi,	12	451.246,197.194, 620.546,99.015, 1027.095,179.093, 863.204,200.847, 928.174,253.072, 722.295,139.038, 904.135,96.979, 492.604,133.896, 727.068,96.904, 870.117,67.547, 959.595,82.805, 1164.193,139.934,
uc011bac.1	A8K0I4	chr3	-	44794833	3	pla_solexa_sample_N0461006,pla_solexa_sample_N0461018,pla_solexa_sample_N0461019,	44790239,44794530,44794683,	3811.609,1281.514,11.219,	AATAAA,multi,AATAAA,	12	324.826,44.157,0.605, 282.527,50.452,0.631, 451.844,92.396,0.633, 262.875,67.934,1.476, 342.265,60.911,0.000, 313.021,79.145,0.000, 365.255,253.180,2.324, 291.755,42.284,0.000, 391.822,336.449,2.408, 231.267,71.552,0.000, 288.347,76.344,0.587, 265.808,106.708,2.556,
uc011mli.1	CDK16	chr23	+	47088167	2	pla_solexa_sample_N2264041,pla_solexa_sample_N2264044,	47088388,47089391,	3572.036,384.343,	none,ATTAAA,	12	201.427,22.380, 291.986,38.467, 168.337,26.580, 216.354,14.029, 171.858,36.257, 221.750,47.772, 402.998,20.325, 338.970,52.149, 851.054,38.521, 202.646,32.629, 255.461,25.839, 249.197,29.393,
uc011mwf.1	HNRPG	chr23	-	135952576	4	pla_solexa_sample_N2306772,pla_solexa_sample_N2306774,pla_solexa_sample_N2306787,pla_solexa_sample_N2306788,	135951353,135951598,135952245,135952380,	532.868,11.832,23.426,1006.768,	AATAAA,AATATA,none,none,	12	21.777,4.235,3.025,109.484, 42.254,1.261,1.893,49.821, 39.871,0.000,0.633,108.216, 43.564,0.000,4.430,152.848, 37.706,0.725,2.175,96.443, 26.381,0.713,1.426,81.285, 91.749,1.742,1.161,66.198, 27.485,1.409,2.114,87.385, 93.892,0.602,3.612,91.485, 44.652,1.144,1.144,38.925, 25.840,0.000,1.174,28.188, 37.700,0.000,0.639,96.485,
